# Supplementary material for: Alkaloid Enantiomers from the Roots of Isatis indigotica
Source: PubMed Central journal article supplement (PMC6749297; doi:10.3390/molecules24173140), 2019-08-29
Supplement: molecules-24-03140-s001.pdf [file molecules-24-03140-s001.pdf]

---

## Supplementary Materials

### Alkaloid enantiomers from the roots of *Isatis indigotica*

Dongdong Zhang <sup>1</sup>, Yanhong Shi <sup>2</sup>, Rui Xu <sup>1</sup>, Kang Du <sup>1</sup>, Fujiang Guo <sup>1</sup>, Kaixian Chen <sup>1,3</sup>,  
Yiming Li <sup>1,\*</sup> and Rui Wang <sup>1,\*</sup>

#### Affiliation

<sup>1</sup> School of Pharmacy, Shanghai University of Traditional Chinese Medicine, Shanghai, 201203, China

<sup>2</sup> Institute of TCM International Standardization of Shanghai University of Traditional Chinese Medicine, Shanghai, 201203, China

<sup>3</sup> Shanghai Institute of Materia Medica, Chinese Academy of Science, Shanghai, 201203, China

#### Corresponding Author

\* E-mail: wr@shutcm.edu.cn (Rui Wang), Tel: 86 21 51322181, Fax: 86 21 51322193.

E-mail: ymlius@163.com (Yiming Li), Tel: 86 21 51322191, Fax: 86 21 51322193.

**ORCID**: Dongdong Zhang: 0000-0003-0956-1261; Yiming Li: 0000-0003-3416-1331; Rui Wang: 0000-0002-6204- 5015

---

## General experimental procedures

Optical rotation was measured using a Rudolph Autopol VI polarimeter (Rudolph, USA); ECD spectra were obtained on a Applied photophysics brighttime chirscan (AppliedPhotophysics, UK); IR spectra were recorded on a Nicolet iS10 instrument (Thermo Fisher Scientific, USA); 1D and 2D NMR spectra were recorded on a Bruker-Avance 600 instrument (Bruker, Germany); The HR-ESI-MS was performed using a Q-TOF-Ultima mass spectrometer (Milford, MA, USA); The crystallographic data were obtained on a Bruker Apex II CCD diffractometer (Bruker, Germany) using Cu-K $\alpha$  radiation ( $\lambda = 1.54178 \text{ \AA}$ ); Semipreparative HPLC was performed on an Agilent infinity II system equipped with a DAD detector (Agilent, USA) and a Capcell Pak C<sub>18</sub> column (10 mm  $\times$  250 mm, 5 $\mu$ m particles, Shiseido, Japan) or a Chiralpak AD-H column (4.6 mm  $\times$  250 mm, 5 $\mu$ m particles, Daicel (China) Investment Co., Ltd.) or ; Sephadex LH-20 (GE Healthcare Bio-Sciences AB); Reversed-phase C<sub>18</sub> silica gel 5 $\mu$ m, YMC Co., Ltd. Japan); MCI gel (CHP-20 P, Mitsubishi Chemical Industries Co., Ltd. Japan); Silica gel (100–200 mesh and 200–300 mesh; Qingdao Haiyang Chemical, China); All solvents used in CC were of analytical grade (Sinopharm Chemical Reagent Co., Ltd. China).

## Extraction and isolation

The air-dried and pulverized root of *I. indigotica* (45 kg) was extracted with 80% EtOH under reflux three times. After removing the solvent under reduced pressure, the concentrated residue was successively partitioned with petroleum ether (PE), dichloromethane (CH<sub>2</sub>Cl<sub>2</sub>) and *n*-BuOH. The CH<sub>2</sub>Cl<sub>2</sub> extract (170 g) was subjected to column chromatography (CC) on silica gel, eluting with a gradient solvent system (CH<sub>2</sub>Cl<sub>2</sub>-MeOH, 100:0 – 100:20) to give eleven fractions (F1 – F11);

---

F3 (16g) was subjected to CC on silica gel, eluting with (CH<sub>2</sub>Cl<sub>2</sub>-MeOH, 100:1 – 100:5) to give six subfractions (F3-1 – F3-6). F3-3 (0.9g) was subjected to CC on Sephadex LH-20 gel, eluting with (CH<sub>2</sub>Cl<sub>2</sub>-MeOH, 1:1) and then purified by HPLC with MeCN-H<sub>2</sub>O (32:68) to afford **5** (200 mg; *t<sub>R</sub>* = 5.8 min). **5** was purified by HPLC with a Chiral pak CD-Ph column, MeCN-H<sub>2</sub>O (80:20) to afford **5a** (118 mg, *t<sub>R</sub>* = 17.2 min) and **5b** (45 mg, *t<sub>R</sub>* = 18.8 min); F-4 (14 g) was subjected to CC on silica gel, eluting with (CH<sub>2</sub>Cl<sub>2</sub>-MeOH, 100:1 ~ 100:5) to give five subfractions (F4-1 – F4-5). F4-3 (1.9g) was subjected to CC on Sephadex LH-20 gel, eluting with (CH<sub>2</sub>Cl<sub>2</sub>-MeOH, 1:1) and then purified by HPLC with MeCN-H<sub>2</sub>O (25:75) to afford **4** (7.9 mg, *t<sub>R</sub>* = 25.5 min), **4** was further purified by HPLC with a Chiral pak AD-H column, normal hexane-isopropanol (18:82) to afford **4a** (2.6 mg, *t<sub>R</sub>* = 16.9 min) and **4b** (2.7 mg, *t<sub>R</sub>* = 15.5 min); F4-4 (0.8g) was subjected to CC on Sephadex LH-20 gel, eluting with (CH<sub>2</sub>Cl<sub>2</sub>-MeOH, 1:1) and then purified by HPLC with MeCN-H<sub>2</sub>O (22:78) to afford **2** (8.5 mg; *t<sub>R</sub>* = 22.6 min), and further purified by HPLC with a Chiral pak AD-H column, normal hexane-isopropanol (80:20) to afford **2a** (3.3 mg, *t<sub>R</sub>* = 27.2 min) and **2b** (3.0 mg, *t<sub>R</sub>* = 24.3 min); F8 (4g) was subjected to CC on RP-C<sub>18</sub> eluting with MeCN-H<sub>2</sub>O (10%, 30%, 60%) to give three subfractions (F8-1 – F8-3). F8-2 (0.2g) was purified by HPLC with MeCN-H<sub>2</sub>O (32:68) to afford **3** (10.2 mg, *t<sub>R</sub>* = 13.3 min) further purified by HPLC with a Chiral pak AD-H column, normal hexane-isopropanol (15:85) to afford **3a** (3.8 mg, *t<sub>R</sub>* = 25.1 min) and **3b** (4.1 mg, *t<sub>R</sub>* = 23.9 min); F8-2 (0.4g) was purified by HPLC with MeCN-H<sub>2</sub>O (35:65) to afford **1** (6.3 mg, *t<sub>R</sub>* = 14.2 min) further purified by HPLC with a Chiral pak AD-H column, normal hexane-isopropanol (20:80) to afford **1a** (3.8 mg, *t<sub>R</sub>* = 13.0 min) and **1b** (4.1 mg, *t<sub>R</sub>* = 16.1 min).

---

## List of Content

| No. | Content                                                                                              | page       |
|-----|------------------------------------------------------------------------------------------------------|------------|
| 1   | <b>Figure S1.</b> The IR spectrum of <b>1a/1b</b> (in KBr)                                           | <b>S6</b>  |
| 2   | <b>Figure S2.</b> The HR-ESI-MS spectrum of <b>1a/1b</b> (in MeOH)                                   | <b>S7</b>  |
| 3   | <b>Figure S3.</b> The $^1\text{H}$ NMR spectrum of <b>1a/1b</b> (in $\text{DMSO-}d_6$ )              | <b>S8</b>  |
| 4   | <b>Figure S4.</b> The $^{13}\text{C}$ NMR spectrum of <b>1a/1b</b> (in $\text{DMSO-}d_6$ )           | <b>S9</b>  |
| 5   | <b>Figure S5.</b> The DEPT $135^\circ$ spectrum of <b>1a/1b</b> (in $\text{DMSO-}d_6$ )              | <b>S10</b> |
| 6   | <b>Figure S6.</b> The HSQC spectrum of <b>1a/1b</b> (in $\text{DMSO-}d_6$ )                          | <b>S11</b> |
| 7   | <b>Figure S7.</b> The HMBC spectrum of <b>1a/1b</b> (in $\text{DMSO-}d_6$ )                          | <b>S12</b> |
| 8   | <b>Figure S8.</b> The $^1\text{H-}^1\text{H}$ COSY spectrum of <b>1a/1b</b> (in $\text{DMSO-}d_6$ )  | <b>S13</b> |
| 9   | <b>Figure S9.</b> The IR spectrum of <b>2a/2b</b> (in KBr)                                           | <b>S14</b> |
| 10  | <b>Figure S10.</b> The HR-ESI-MS spectrum of <b>2a/2b</b> (in MeOH)                                  | <b>S15</b> |
| 11  | <b>Figure S11.</b> The $^1\text{H}$ NMR spectrum of <b>2a/2b</b> (in $\text{DMSO-}d_6$ )             | <b>S16</b> |
| 12  | <b>Figure S12.</b> The $^{13}\text{C}$ NMR spectrum of <b>2a/2b</b> (in $\text{DMSO-}d_6$ )          | <b>S17</b> |
| 13  | <b>Figure S13.</b> The DEPT $135^\circ$ spectrum of <b>2a/2b</b> (in $\text{DMSO-}d_6$ )             | <b>S18</b> |
| 14  | <b>Figure S14.</b> The HSQC spectrum of <b>2a/2b</b> (in $\text{DMSO-}d_6$ )                         | <b>S19</b> |
| 15  | <b>Figure S15.</b> The HMBC spectrum of <b>2a/2b</b> (in $\text{DMSO-}d_6$ )                         | <b>S20</b> |
| 16  | <b>Figure S16.</b> The $^1\text{H-}^1\text{H}$ COSY spectrum of <b>2a/2b</b> (in $\text{DMSO-}d_6$ ) | <b>S21</b> |
| 17  | <b>Figure S17.</b> The IR spectrum of <b>3a/3b</b> (in KBr)                                          | <b>S22</b> |
| 18  | <b>Figure S18.</b> The HR-ESI-MS spectrum of <b>3a/3b</b> (in MeOH)                                  | <b>S23</b> |
| 19  | <b>Figure S19.</b> The $^1\text{H}$ NMR spectrum of <b>3a/3b</b> (in $\text{DMSO-}d_6$ )             | <b>S24</b> |
| 20  | <b>Figure S20.</b> The $^{13}\text{C}$ NMR spectrum of <b>3a/3b</b> (in $\text{DMSO-}d_6$ )          | <b>S25</b> |
| 21  | <b>Figure S21.</b> The DEPT $135^\circ$ spectrum of <b>3a/3b</b> (in $\text{DMSO-}d_6$ )             | <b>S26</b> |
| 22  | <b>Figure S22.</b> The HSQC spectrum of <b>3a/3b</b> (in $\text{DMSO-}d_6$ )                         | <b>S27</b> |

|    |                                                                                                                                                                                                                    |            |
|----|--------------------------------------------------------------------------------------------------------------------------------------------------------------------------------------------------------------------|------------|
| 23 | <b>Figure S23.</b> The HMBC spectrum of <b>3a/3b</b> (in DMSO- <i>d</i> <sub>6</sub> )                                                                                                                             | <b>S28</b> |
| 24 | <b>Figure S24.</b> The <sup>1</sup> H- <sup>1</sup> H COSY spectrum of <b>3a/3b</b> (in DMSO- <i>d</i> <sub>6</sub> )                                                                                              | <b>S29</b> |
| 25 | <b>Figure S25.</b> The ROESY spectrum of <b>3a/3b</b> (in DMSO- <i>d</i> <sub>6</sub> )                                                                                                                            | <b>S30</b> |
| 26 | <b>Figure S28.</b> b3lyp/6-31g(d) optimized lowest energy conformers for (3' <i>S</i> ,2'' <i>R</i> )- <b>1</b> and (3' <i>S</i> ,2'' <i>S</i> )- <b>1</b> and their equilibrium populations                       | <b>S31</b> |
| 27 | <b>Figure S27.</b> Experimental and calculated ECD spectrum of <b>1</b>                                                                                                                                            | <b>S32</b> |
| 28 | <b>Figure S28.</b> b3lyp/6-31g(d) optimized lowest energy conformers for (2' <i>R</i> )- <b>2</b> and their equilibrium populations                                                                                | <b>S33</b> |
| 29 | <b>Figure S29.</b> Experimental and calculated ECD spectrum of <b>1</b>                                                                                                                                            | <b>S34</b> |
| 30 | <b>Figure S30.</b> b3lyp/6-31g(d) optimized lowest energy conformers for (4 <i>S</i> ,2' <i>R</i> ,3' <i>R</i> )- <b>3</b> and (4 <i>S</i> ,2' <i>S</i> ,3' <i>R</i> )- <b>3</b> and their equilibrium populations | <b>S35</b> |
| 31 | <b>Figure S31.</b> b3lyp/6-31g(d) optimized lowest energy conformers for (4 <i>R</i> ,2' <i>R</i> ,3' <i>R</i> )- <b>3</b> and (4 <i>R</i> ,2' <i>S</i> ,3' <i>R</i> )- <b>3</b> and their equilibrium populations | <b>S36</b> |
| 32 | <b>Figure S32.</b> Experimental and calculated ECD spectrum of <b>3</b>                                                                                                                                            | <b>S37</b> |
| 33 | <b>Figure S33.</b> Experimental and calculated ECD spectrum of <b>3</b>                                                                                                                                            | <b>S38</b> |
| 34 | <b>Figure S34.</b> Chiral separation chromatography of <b>1</b>                                                                                                                                                    | <b>S39</b> |
| 35 | <b>Figure S35.</b> Chiral separation chromatography of <b>2</b>                                                                                                                                                    | <b>S40</b> |
| 36 | <b>Figure S36.</b> Chiral separation chromatography of <b>3</b>                                                                                                                                                    | <b>S41</b> |
| 37 | <b>Figure S37.</b> Crystallographic data of <b>2b</b>                                                                                                                                                              | <b>S42</b> |
| 38 | <b>Figure S38.</b> The <sup>1</sup> H NMR spectrum of <b>4a/4b</b> (in DMSO- <i>d</i> <sub>6</sub> )                                                                                                               | <b>S43</b> |
| 39 | <b>Figure S39.</b> The <sup>13</sup> C NMR spectrum of <b>4a/4b</b> (in DMSO- <i>d</i> <sub>6</sub> )                                                                                                              | <b>S44</b> |
| 40 | <b>Figure S40.</b> Chiral separation chromatography of <b>4</b>                                                                                                                                                    | <b>S45</b> |
| 41 | <b>Figure S41.</b> The <sup>1</sup> H NMR spectrum of <b>1a/1b</b> (in D <sub>2</sub> O)                                                                                                                           | <b>S46</b> |
| 42 | <b>Figure S42.</b> The <sup>13</sup> C NMR spectrum of <b>1a/1b</b> (in D <sub>2</sub> O)                                                                                                                          | <b>S47</b> |
| 43 | <b>Figure S43.</b> Chiral separation chromatography of <b>5</b>                                                                                                                                                    | <b>S48</b> |

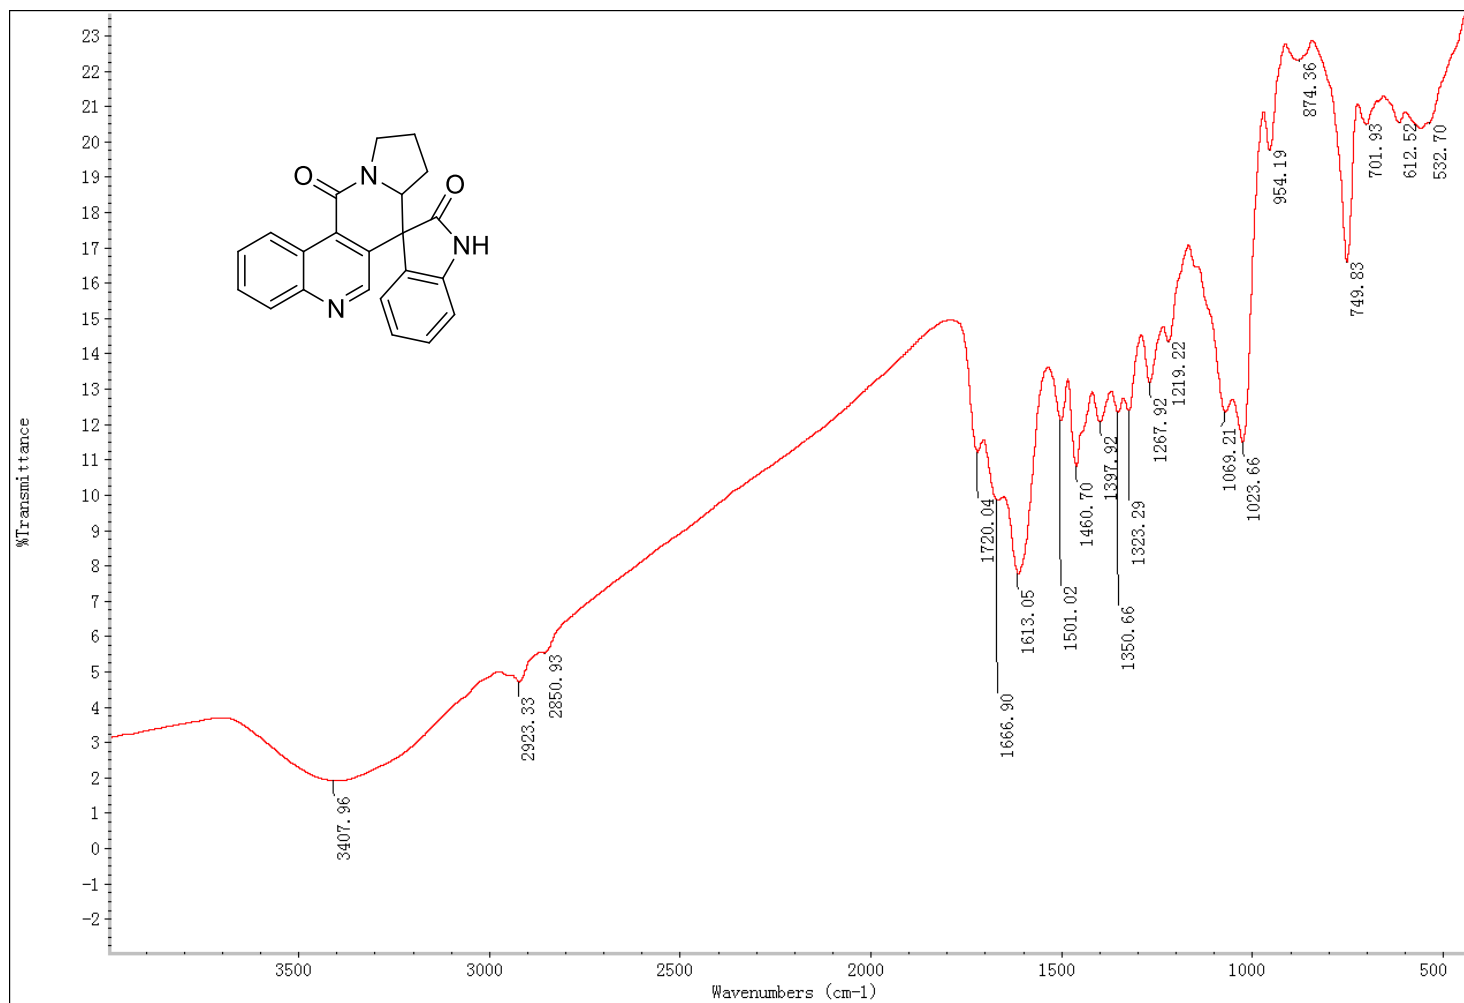

**Figure S1.** The IR spectrum of **1a/1b** (in KBr)

## Qualitative Analysis Report

|                 |                                        |                        |                             |
|-----------------|----------------------------------------|------------------------|-----------------------------|
| Data Filename   | ESIH_20181024_ZWL_ZYT_04.d             | Sample Name            | ZYT-002-42                  |
| Sample Type     | Sample                                 | Position               | P1-B2                       |
| Instrument Name | Agilent G6520 Q-TOF                    | Acq Method             | 20160322_MS_ESIH_POS_1min.m |
| Acquired Time   | 10/24/2018 19:33:50                    | IRM Calibration Status | Success                     |
| DA Method       | small molecular data analysis method.m | Comment                | ESIH by ZZY                 |

### User Spectra

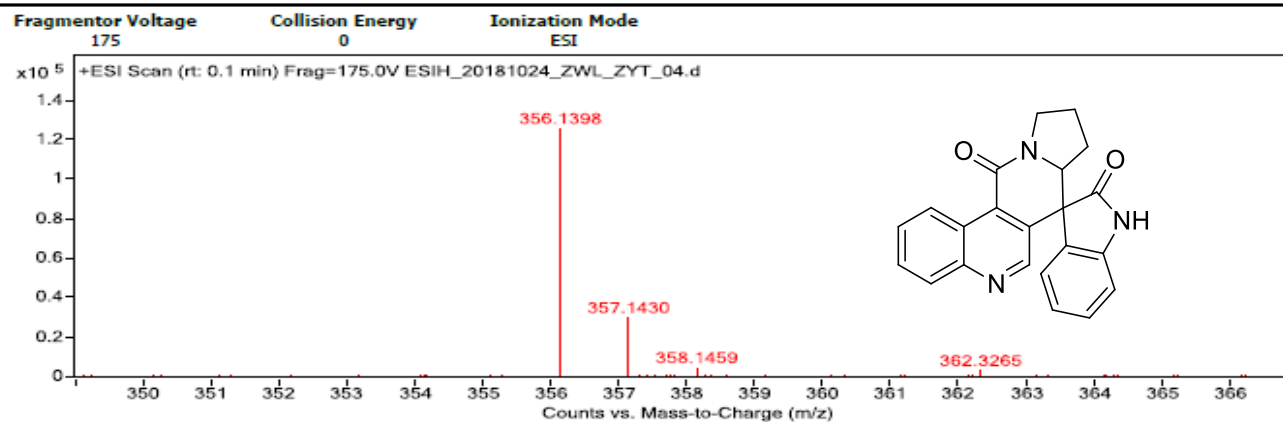

### Formula Calculator Results

| m/z      | Calc m/z | Diff (mDa) | Diff (ppm) | Ion Formula   | Ion                |
|----------|----------|------------|------------|---------------|--------------------|
| 356.1398 | 356.1394 | -0.4       | -1.12      | C22 H18 N3 O2 | (M+H) <sup>+</sup> |

--- End Of Report ---

Figure S2. The HR-ESI-MS spectrum of **1a/1b** (in MeOH)

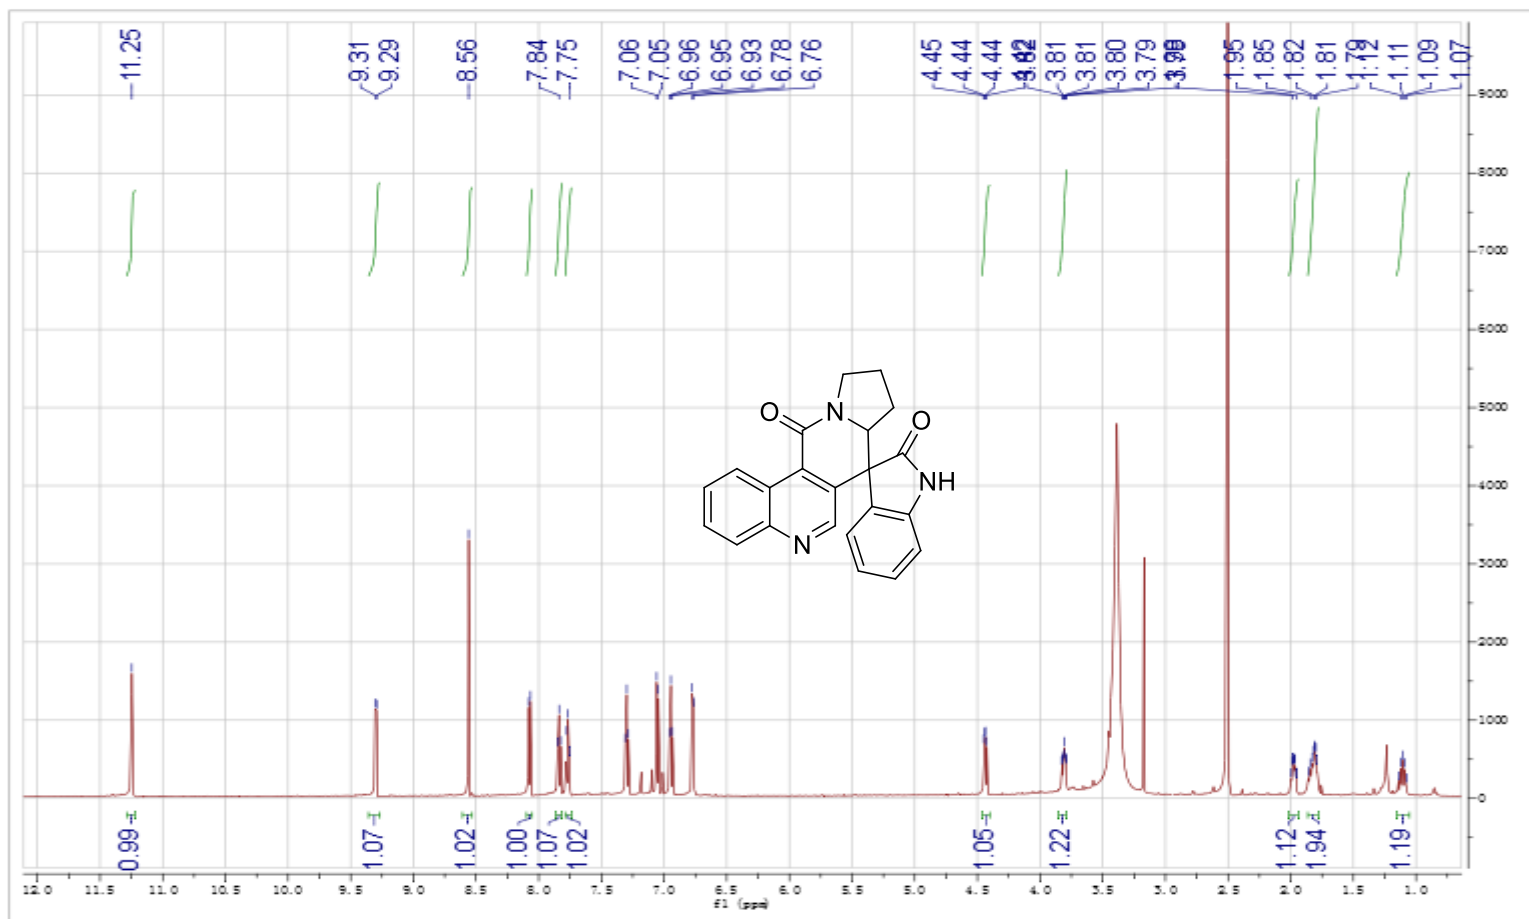

**Figure S3.** The  $^1\text{H}$  NMR spectrum of **1a/1b** (in  $\text{DMSO-}d_6$ )



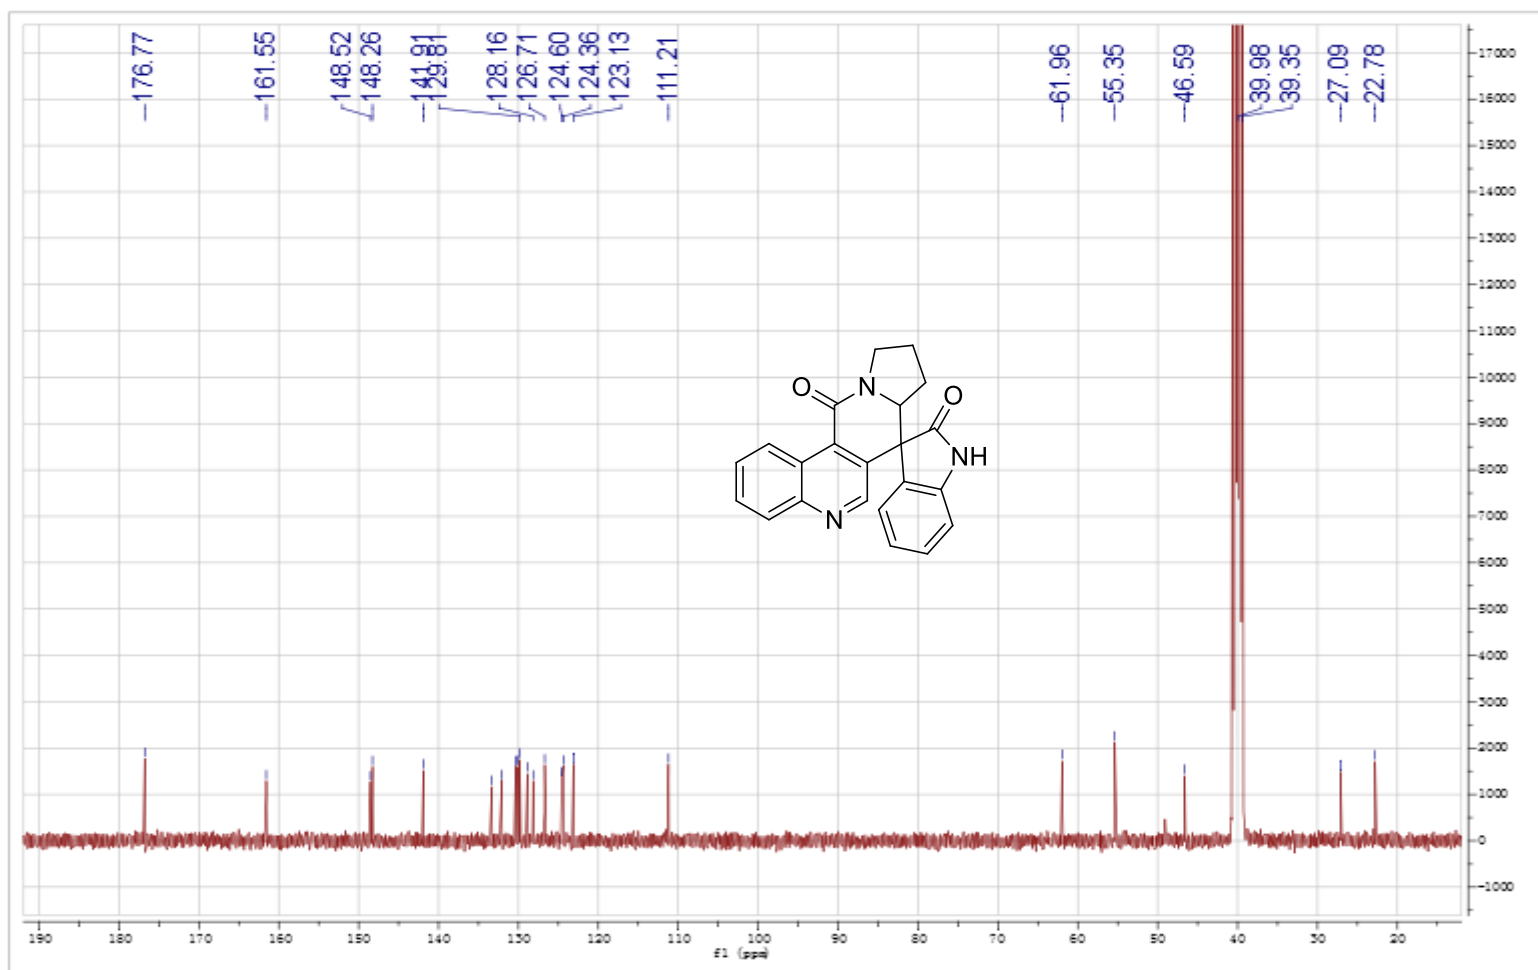

**Figure S4.** The  $^{13}\text{C}$  NMR spectrum of **1a/1b** (in  $\text{DMSO-}d_6$ )

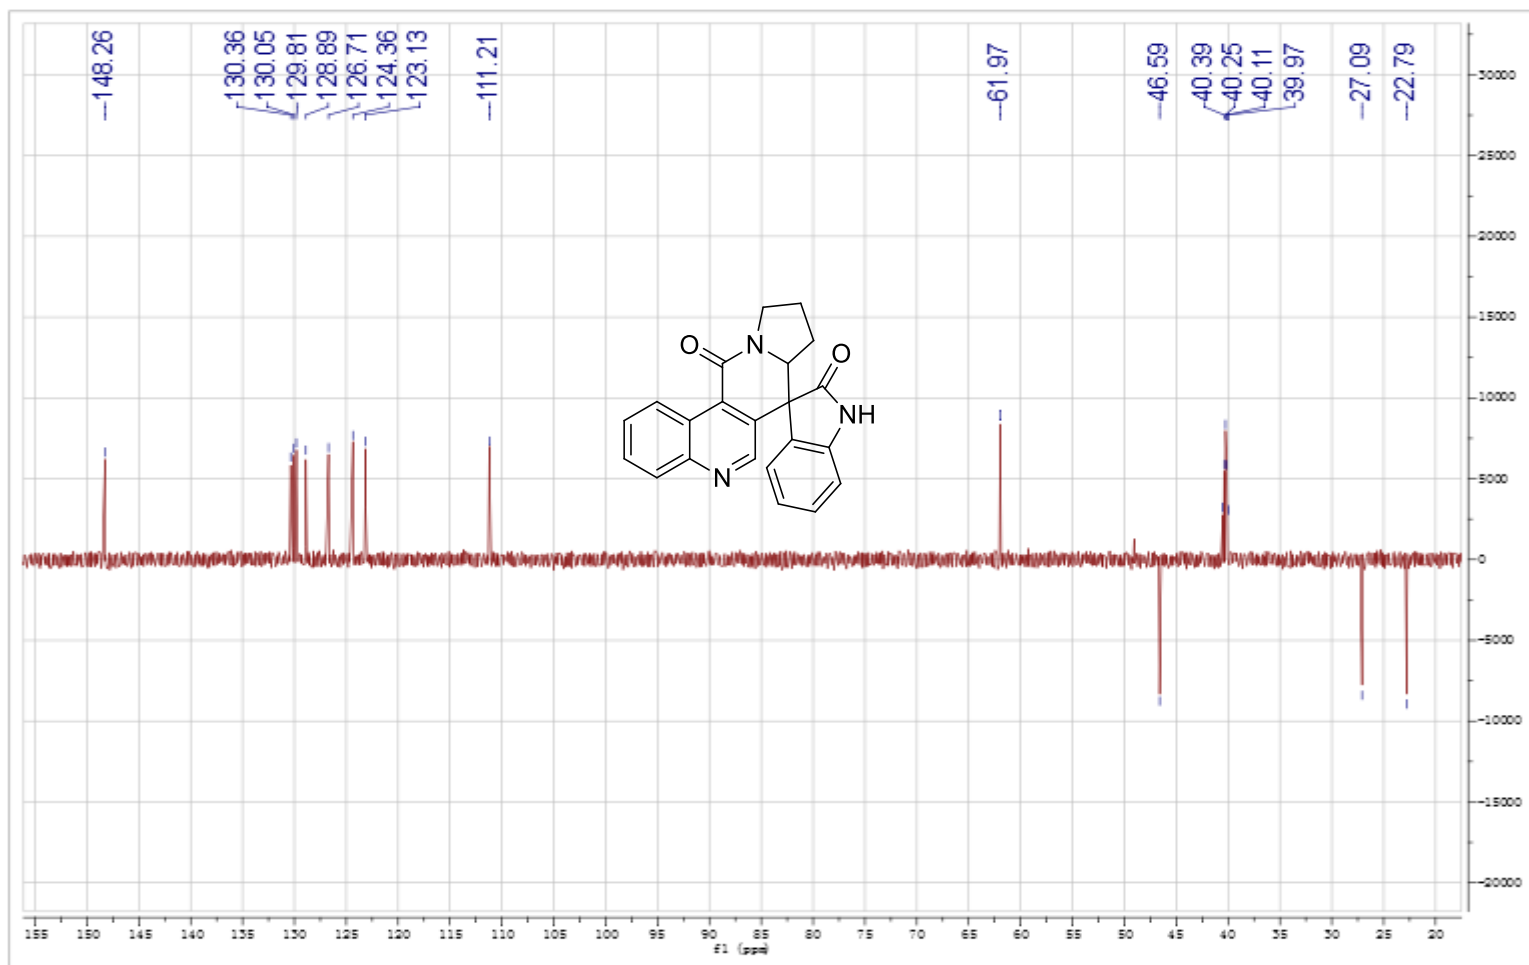

**Figure S5.** The DEPT 135° spectrum of **1a/1b** (in DMSO-*d*<sub>6</sub>)

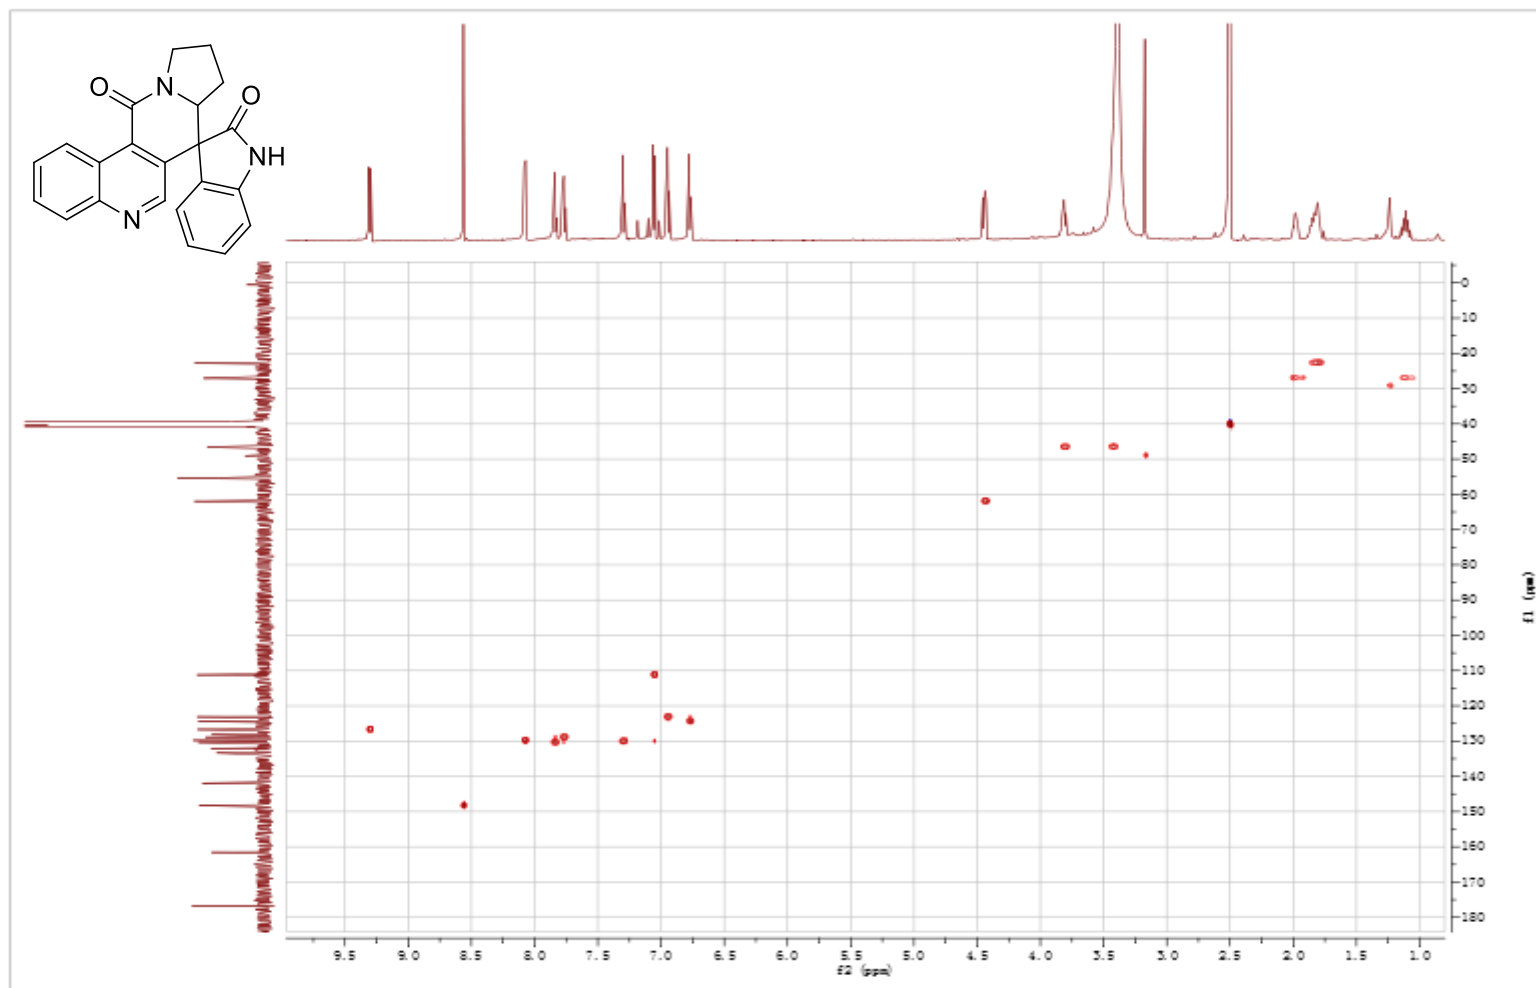

**Figure S6.** The HSQC spectrum of **1a/1b** (in  $\text{DMSO-}d_6$ )

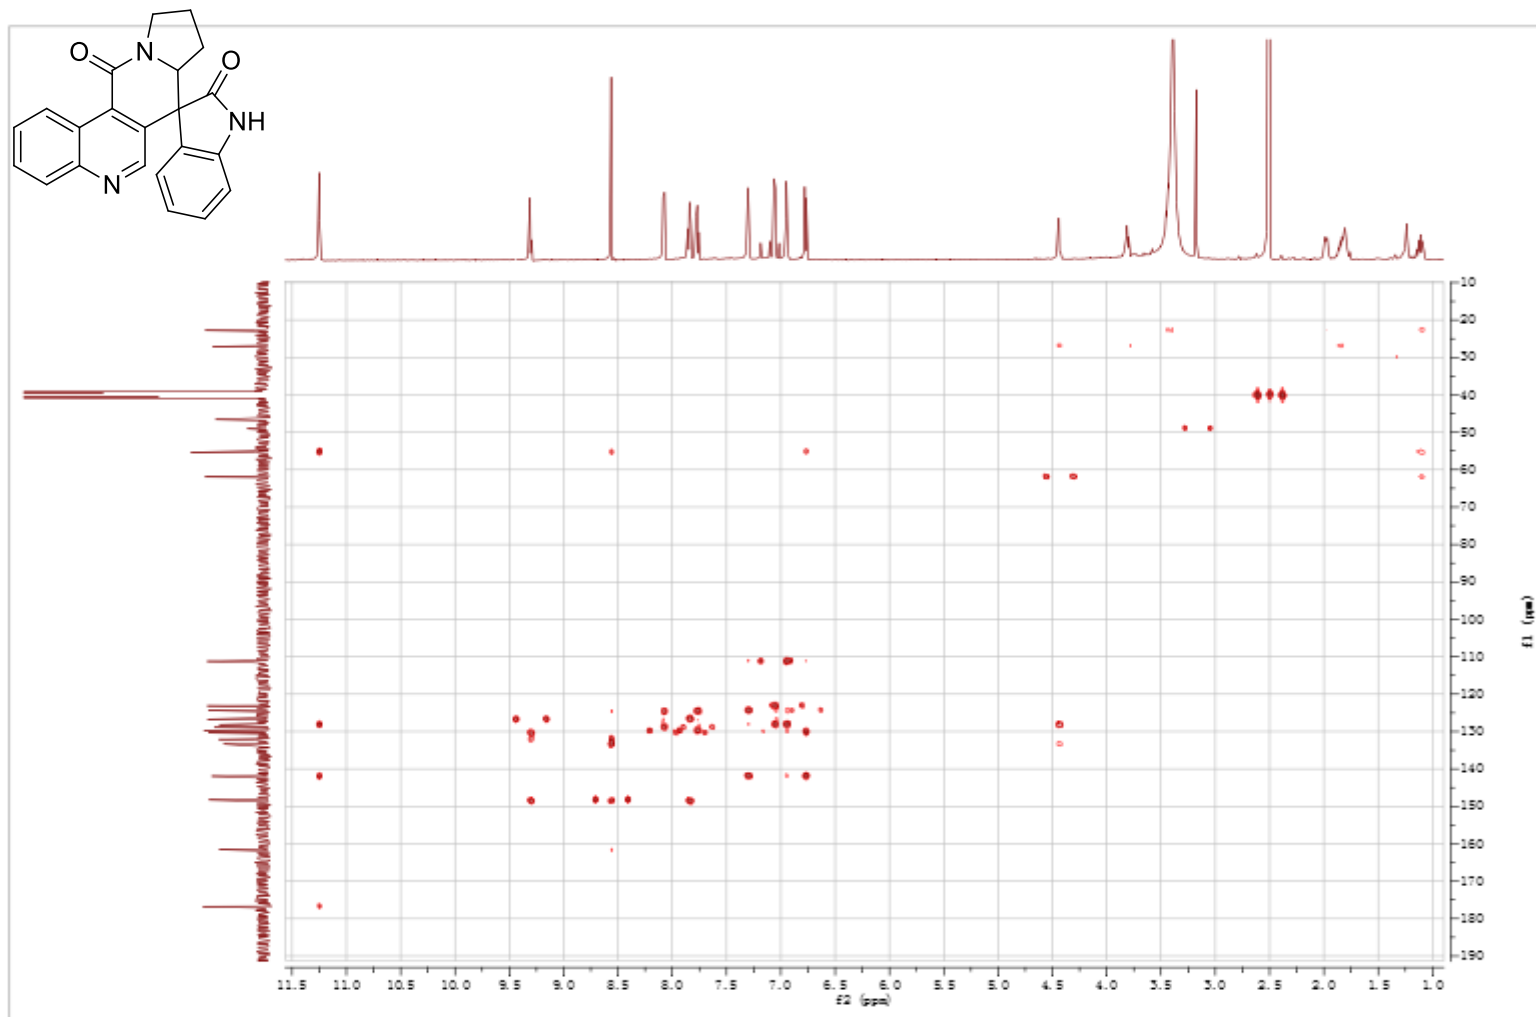

**Figure S7.** The HMBC spectrum of **1a/1b** (in DMSO-*d*<sub>6</sub>)

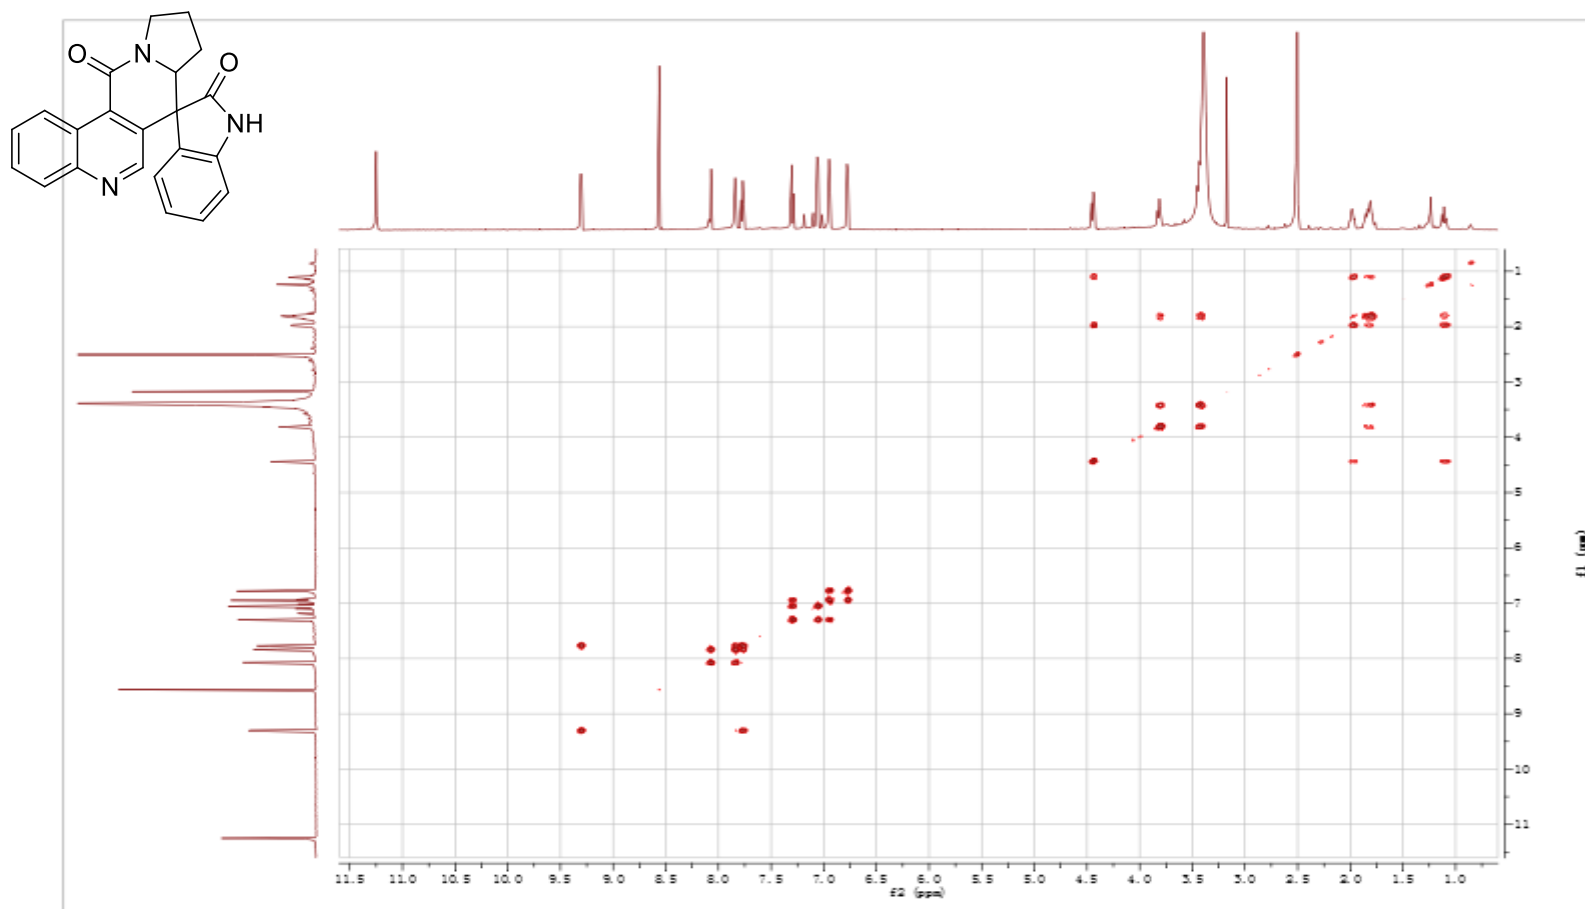

**Figure S8.** The  $^1\text{H}$ - $^1\text{H}$  COSY spectrum of **1a/1b** (in  $\text{DMSO-}d_6$ )

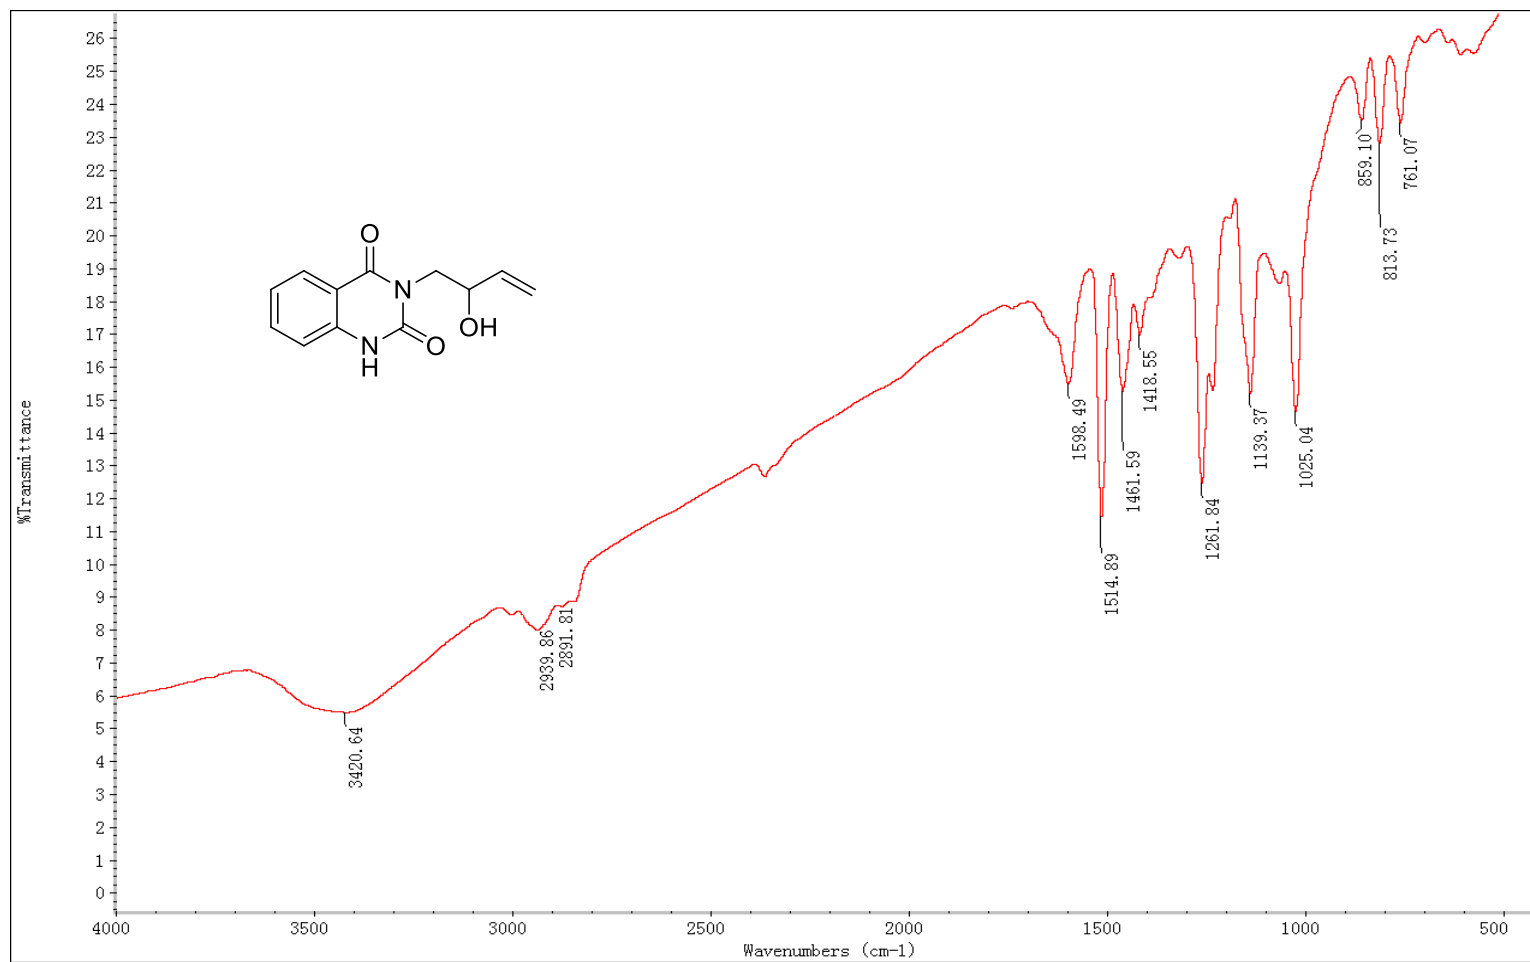

**Figure S9.** The IR spectrum of **2a/2b** (in KBr)

## Qualitative Analysis Report

|                 |                                        |                        |                             |
|-----------------|----------------------------------------|------------------------|-----------------------------|
| Data Filename   | ESI_H_20180917_ZWL_ZYT_43.d            | Sample Name            | ZYT-002-22                  |
| Sample Type     | Sample                                 | Position               | P1-E4                       |
| Instrument Name | Agilent G6520 Q-TOF                    | Acq Method             | 20160324_MS_ESIH_NEG_1min.m |
| Acquired Time   | 9/17/2018 16:00:45                     | IRM Calibration Status | Success                     |
| DA Method       | small molecular data analysis method.m | Comment                | ESI_H BY ZZY                |

### User Spectra

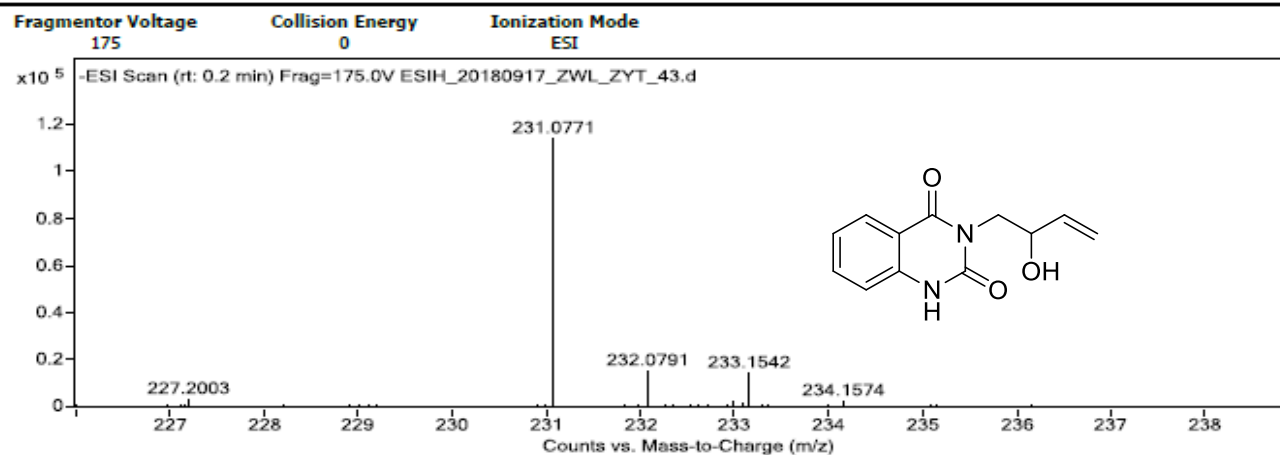

### Formula Calculator Results

| m/z      | Calc m/z | Diff (mDa) | Diff (ppm) | Ion Formula   | Ion    |
|----------|----------|------------|------------|---------------|--------|
| 231.0771 | 231.0775 | 0.4        | 1.74       | C12 H11 N2 O3 | (M-H)- |

--- End Of Report ---

Figure S10. The HR-ESI-MS spectrum of **2a/2b** (in MeOH)

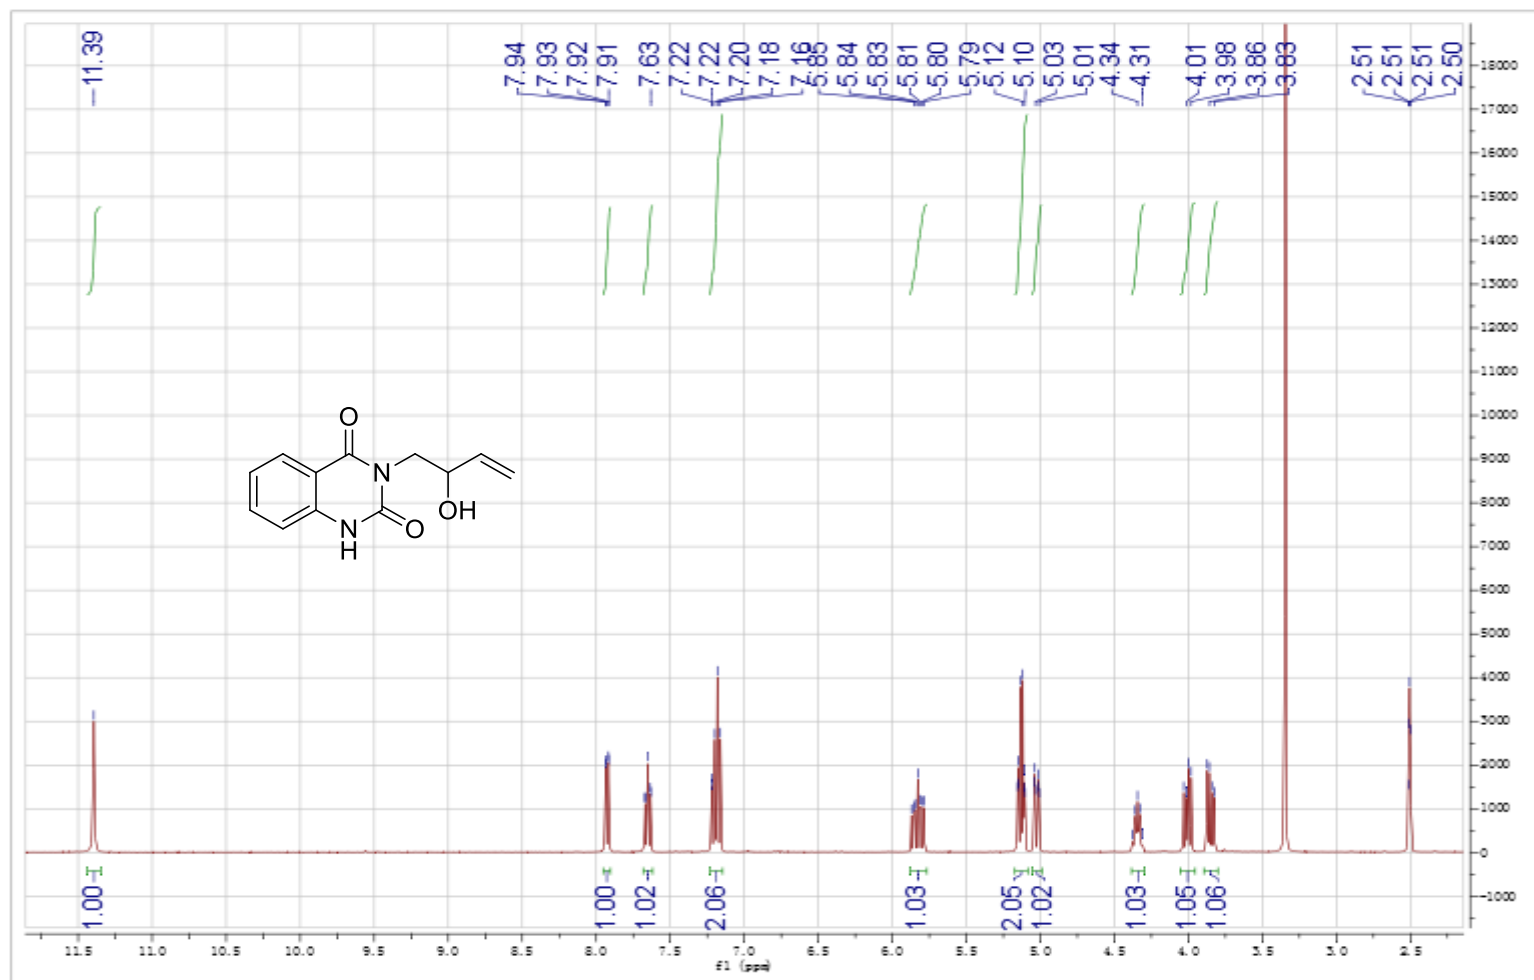

**Figure S11.** The  $^1\text{H}$  NMR spectrum of **2a/2b** (in  $\text{DMSO-}d_6$ )



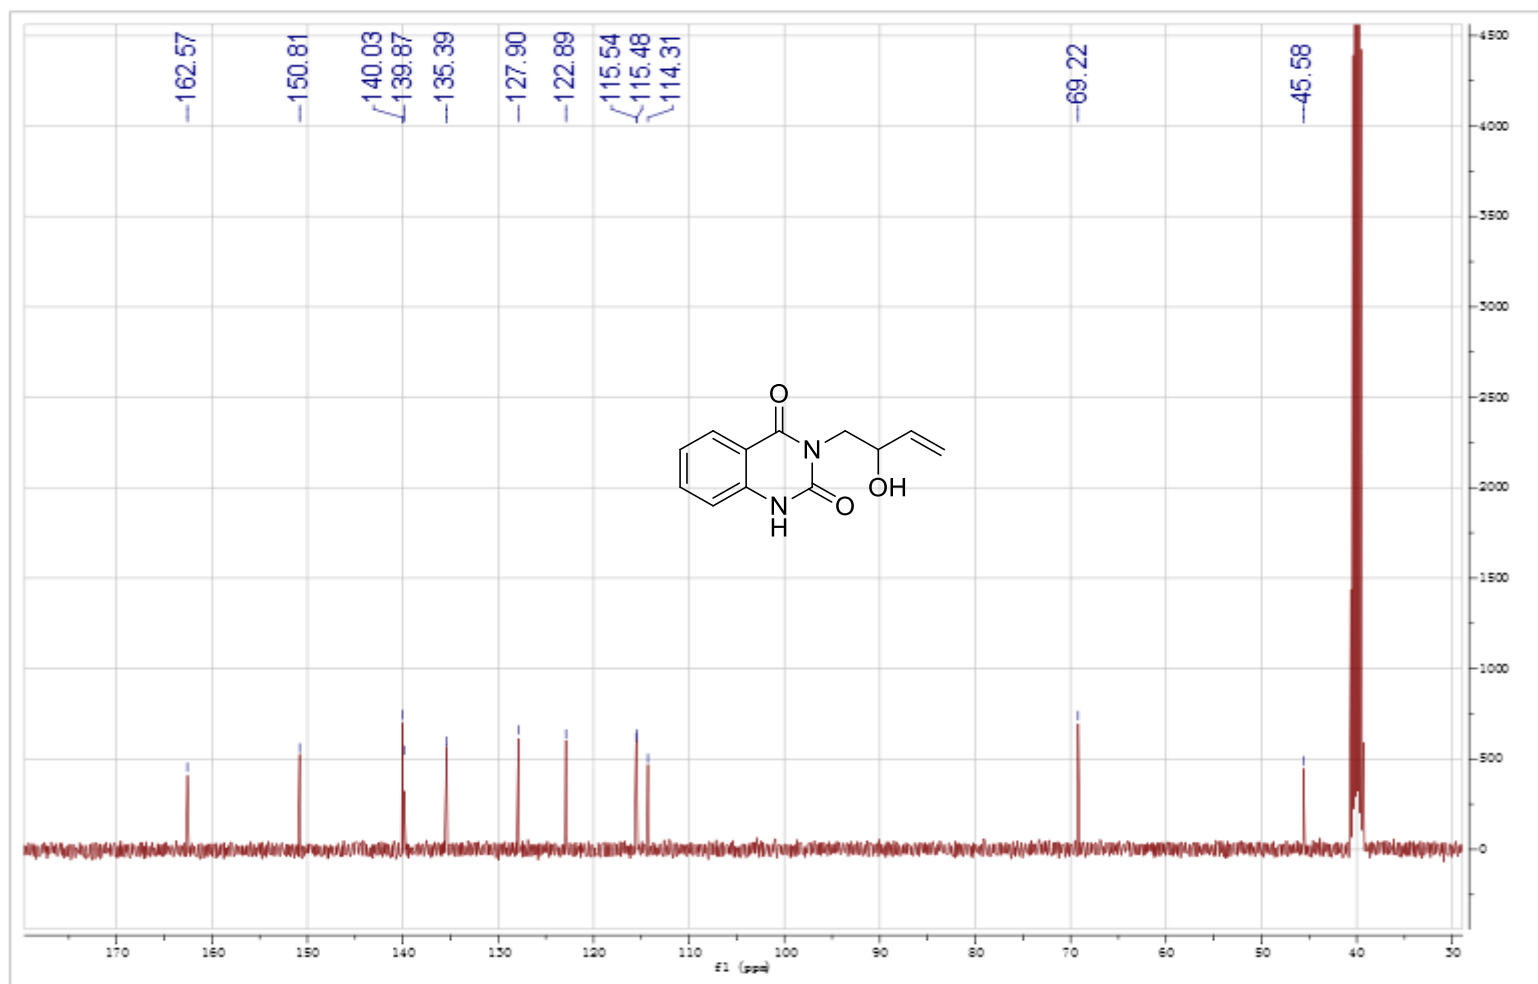

**Figure S12.** The  $^{13}\text{C}$  NMR spectrum of **2a/2b** (in  $\text{DMSO-}d_6$ )

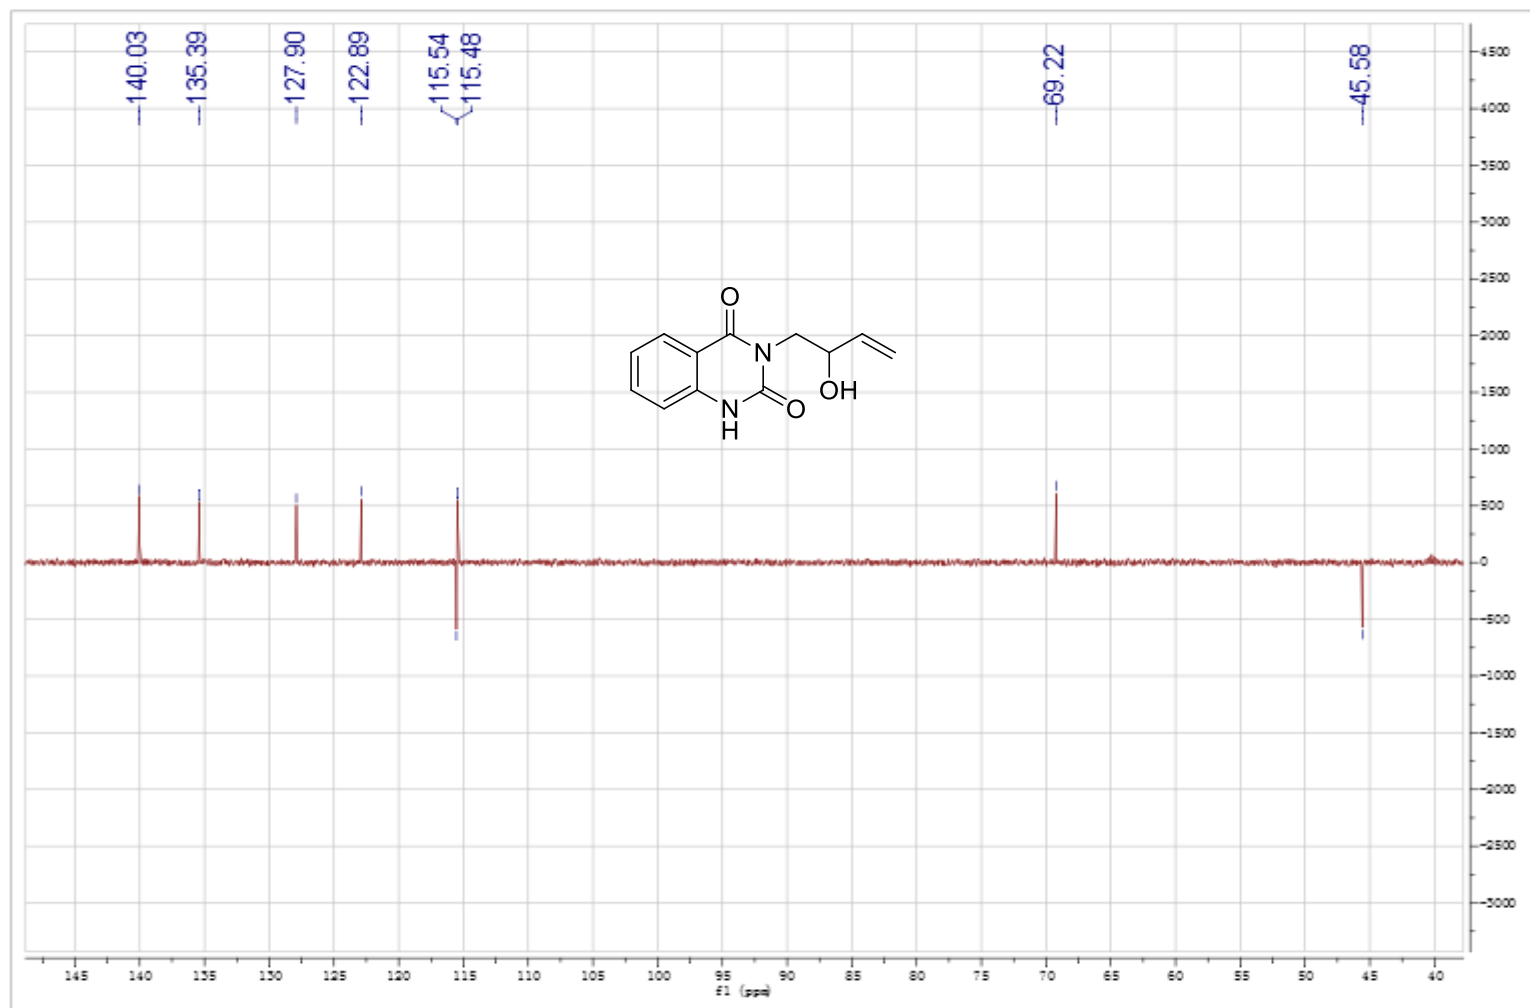

**Figure S13.** The DEPT 135° spectrum of **2a/2b** (in DMSO-*d*<sub>6</sub>)

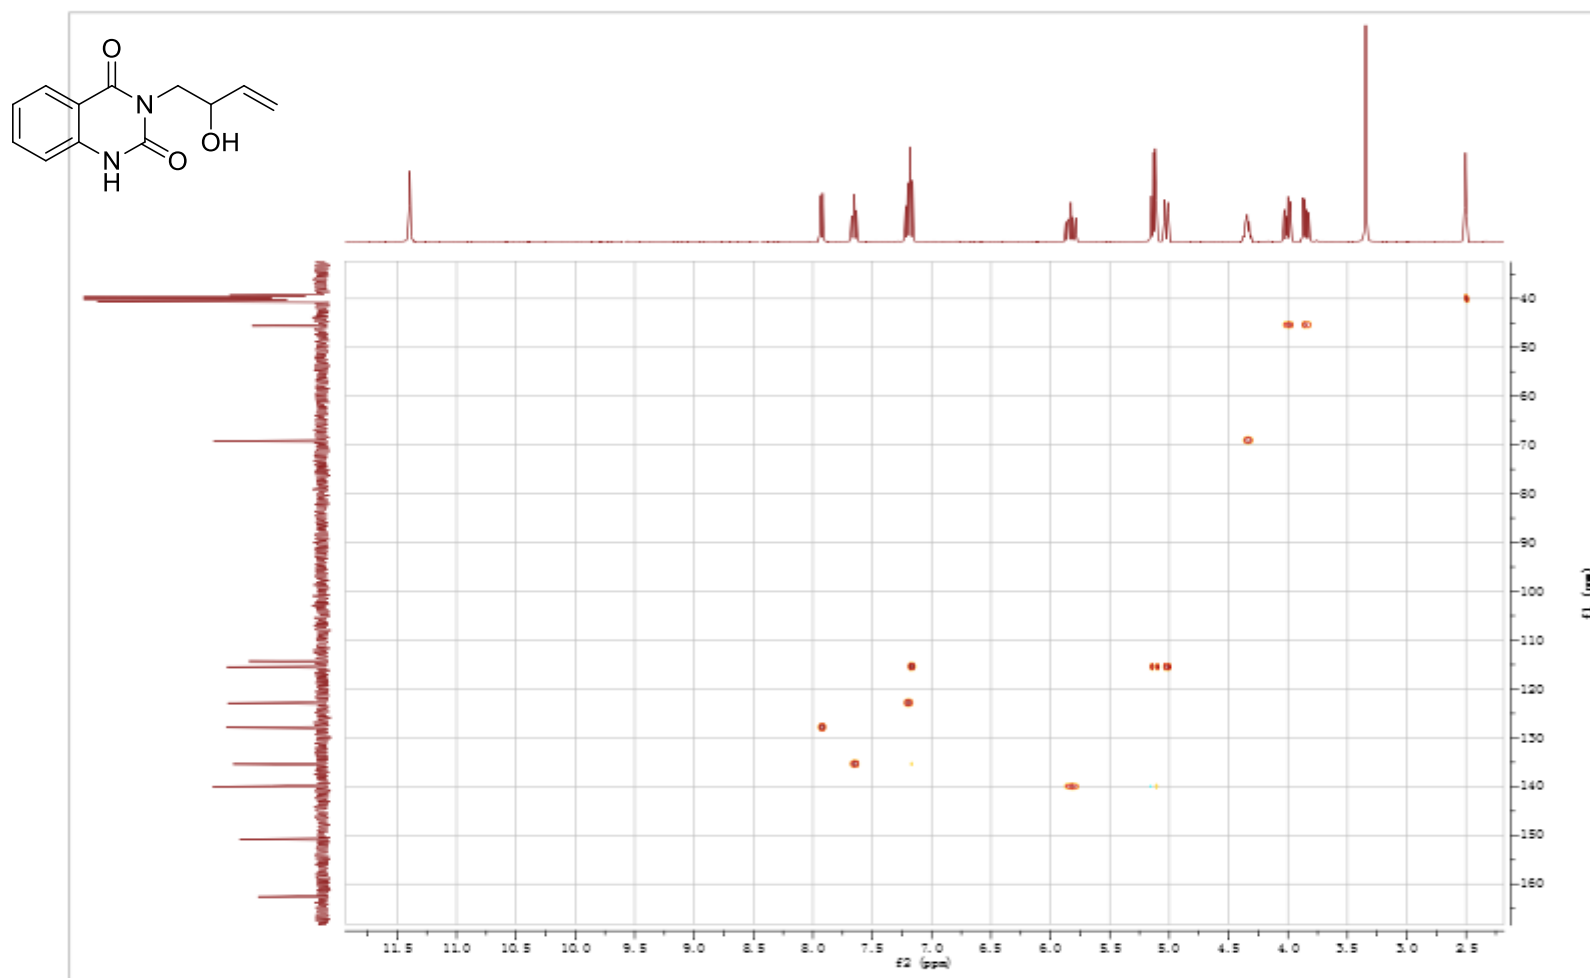

**Figure S14.** The HSQC spectrum of **2a/2b** (in DMSO-*d*<sub>6</sub>)

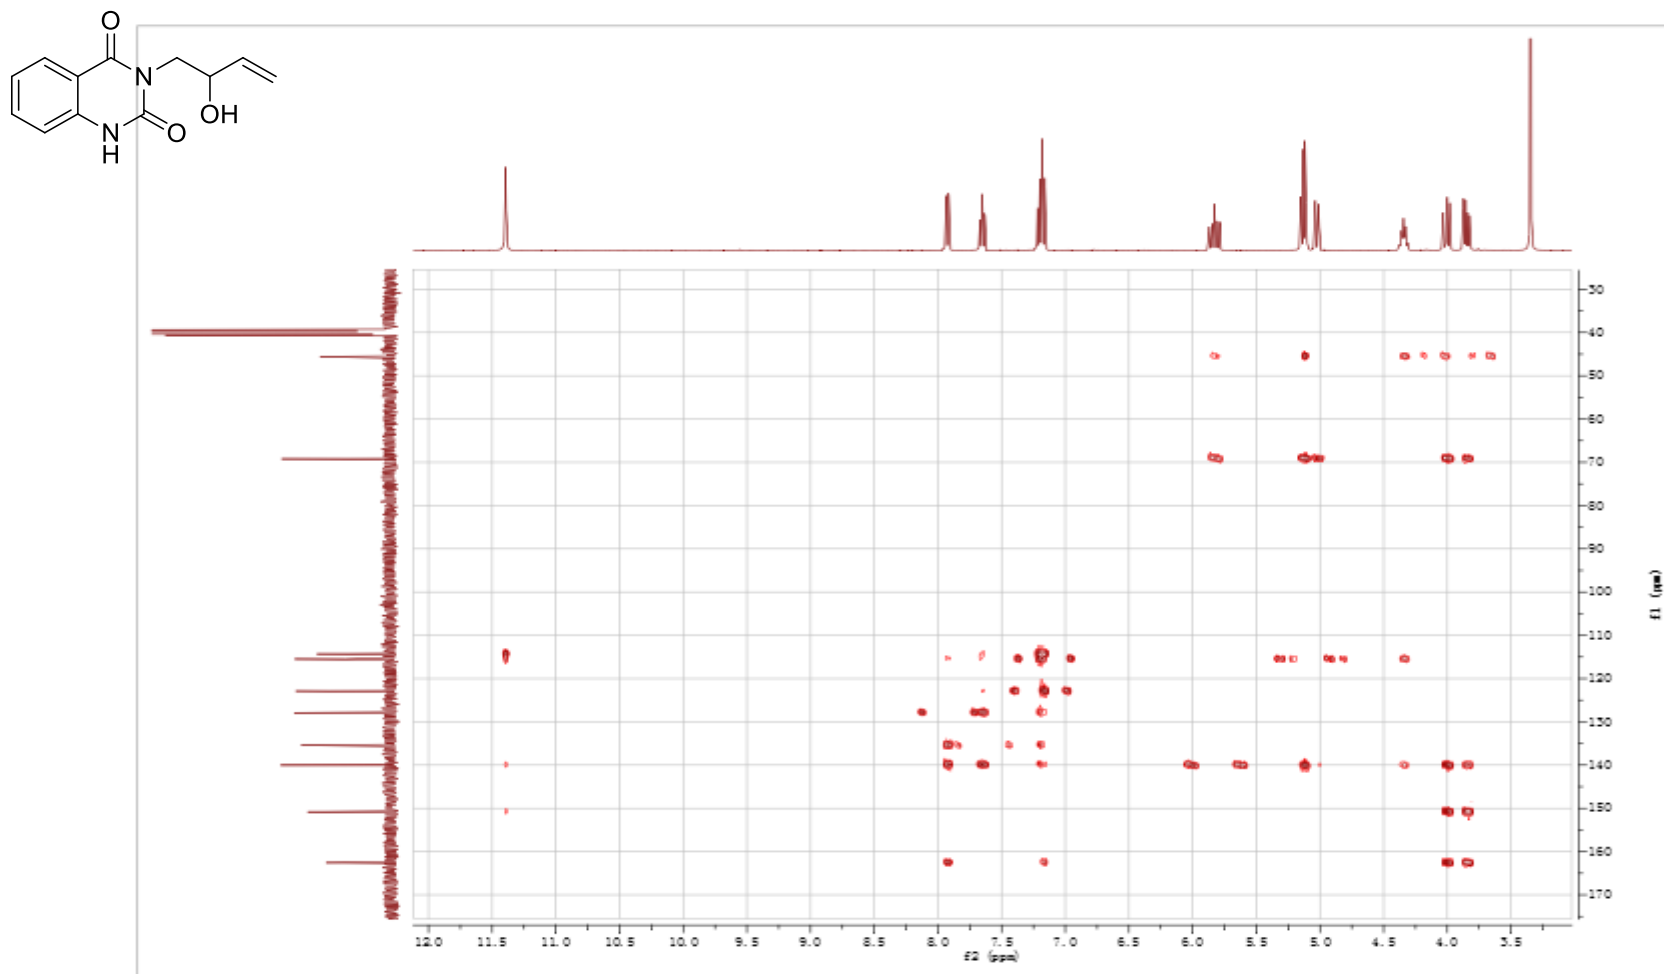

**Figure S15.** The HMBC spectrum of **2a/2b** (in DMSO-*d*<sub>6</sub>)

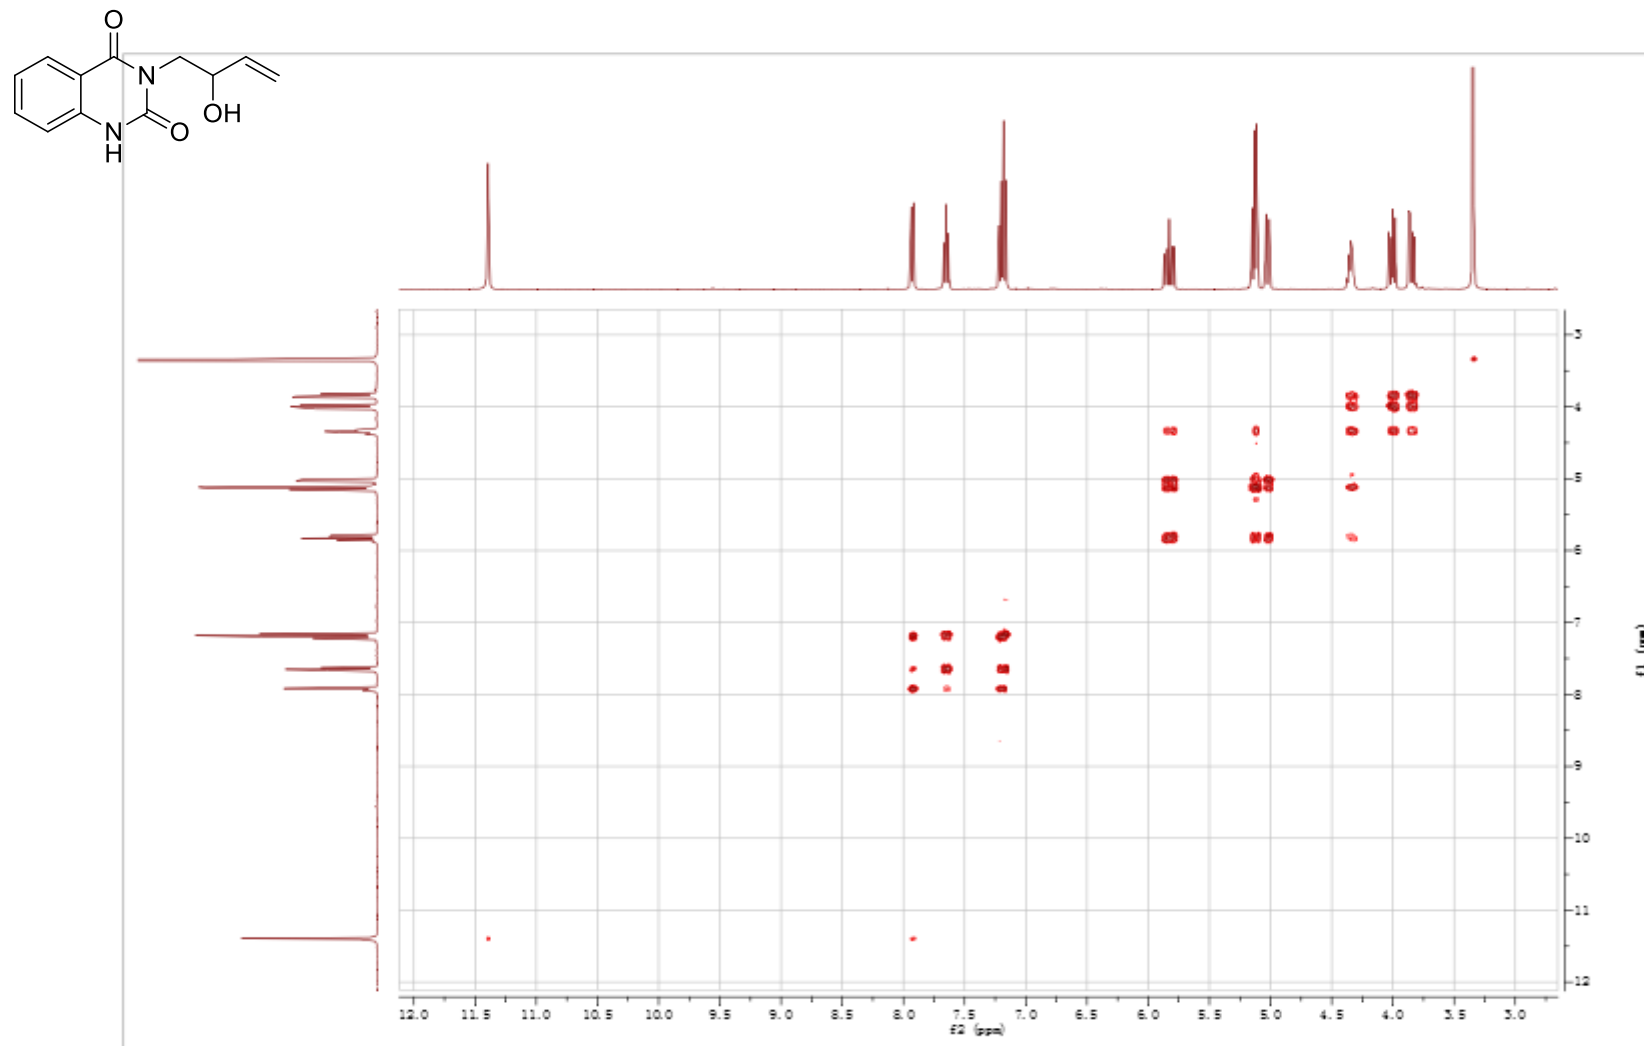

**Figure S16.** The  $^1\text{H}$ - $^1\text{H}$  COSY spectrum of **2a/2b** (in  $\text{DMSO}-d_6$ )

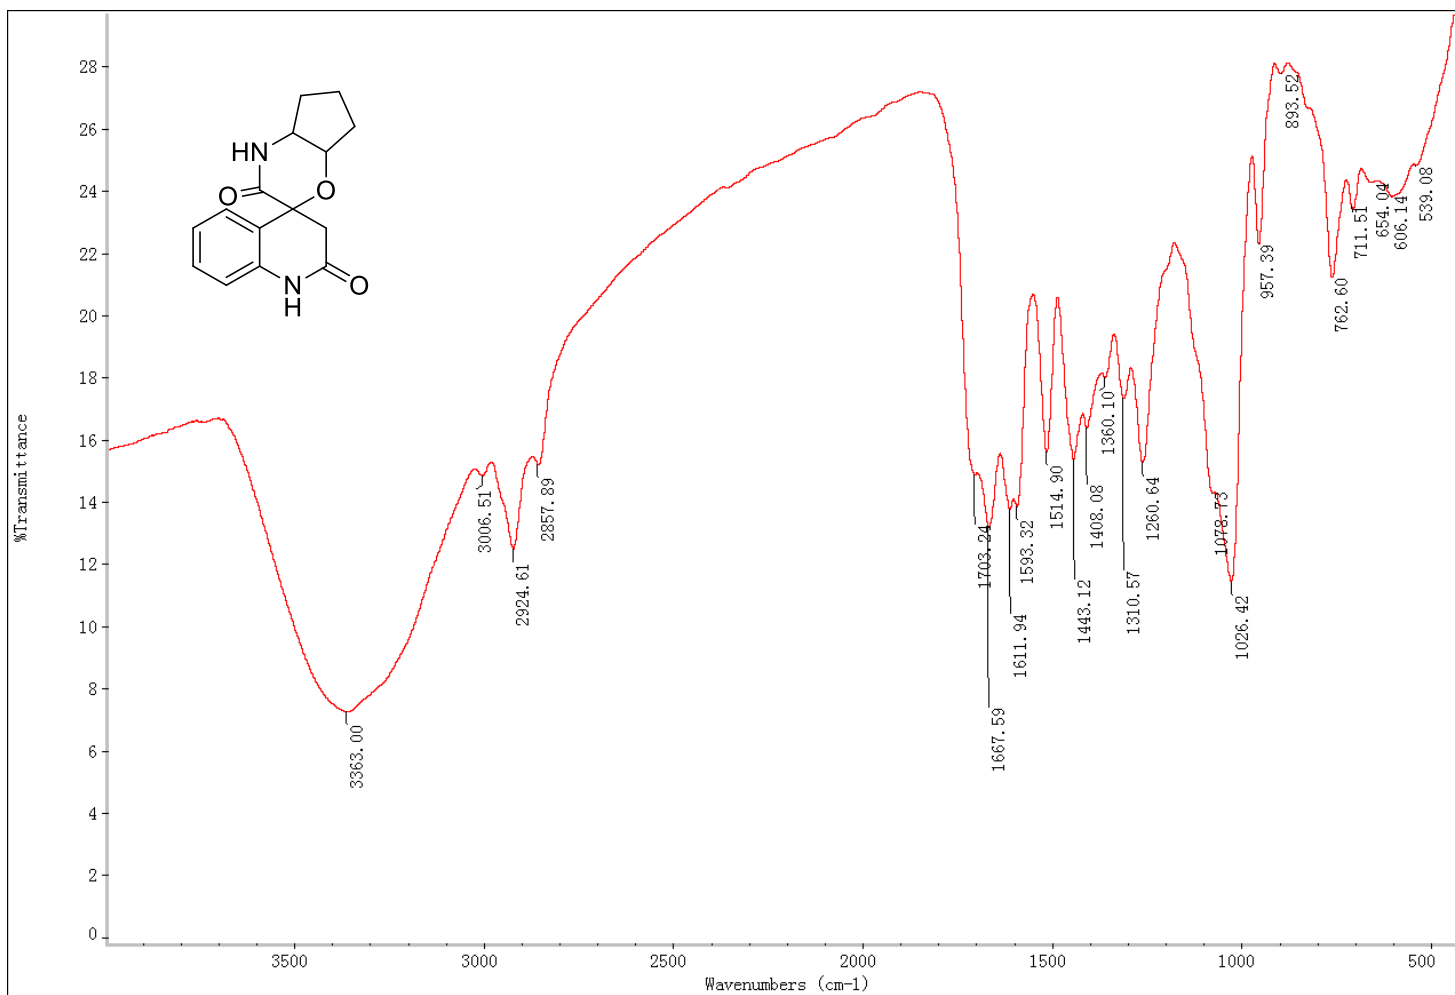

**Figure S17.** The IR spectrum of **3a/3b** (in KBr)

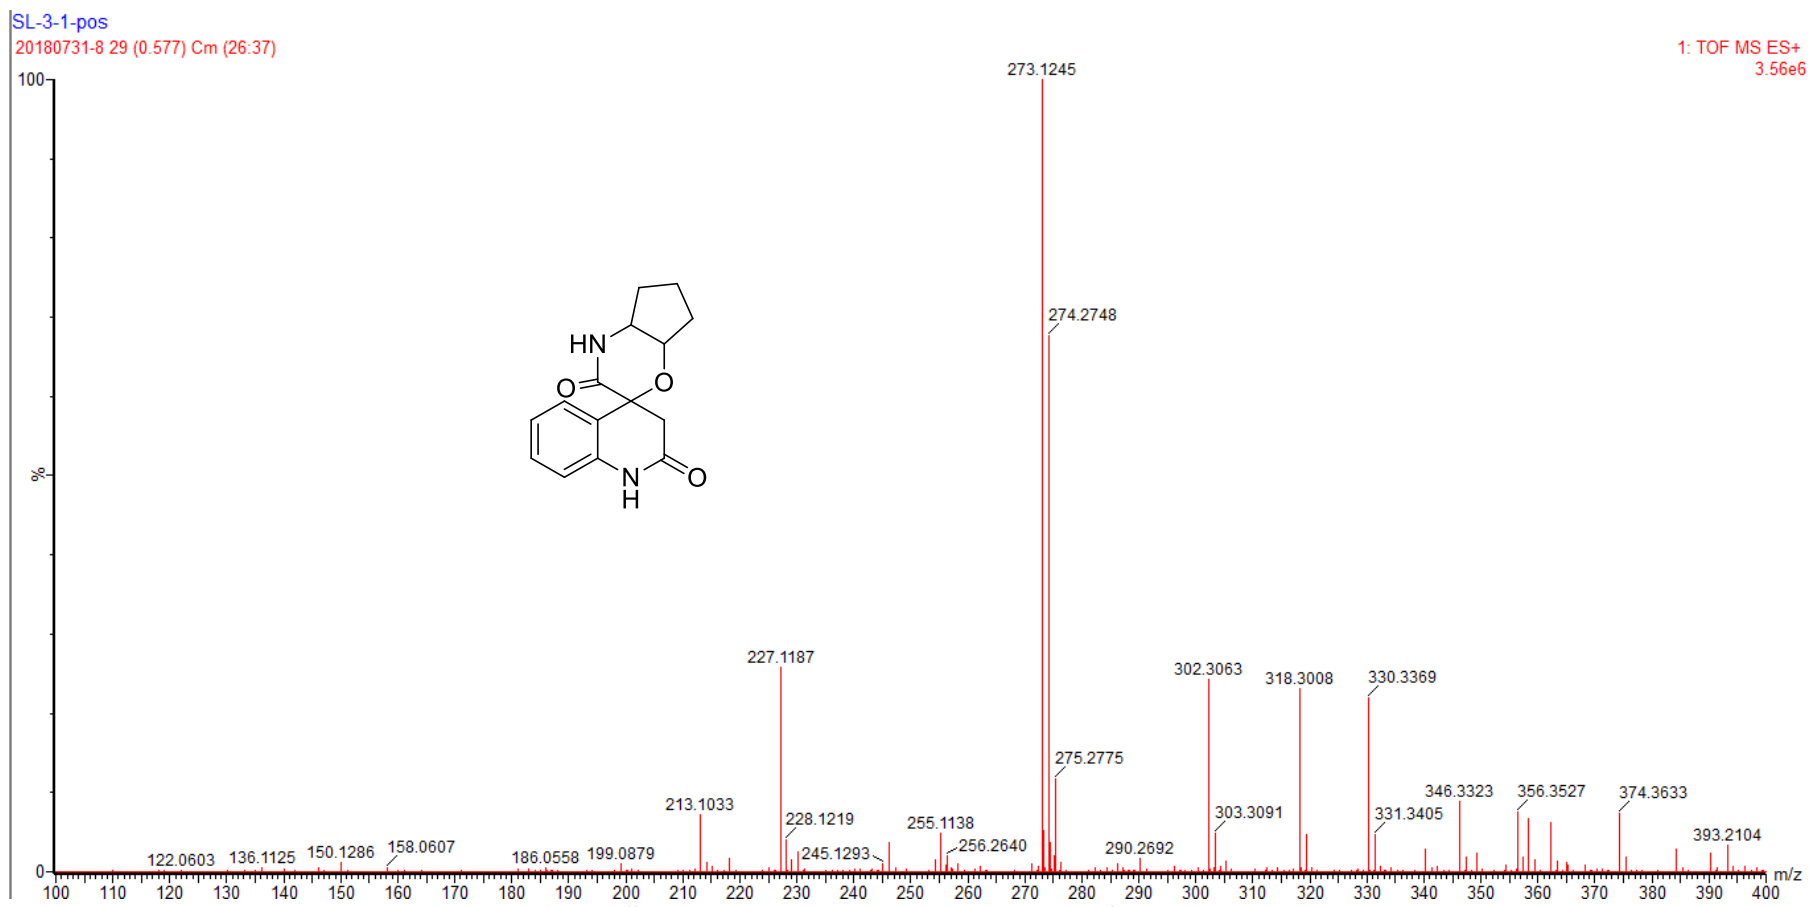

Figure S18. The HR-ESI-MS spectrum of **3a/3b** (in MeOH)

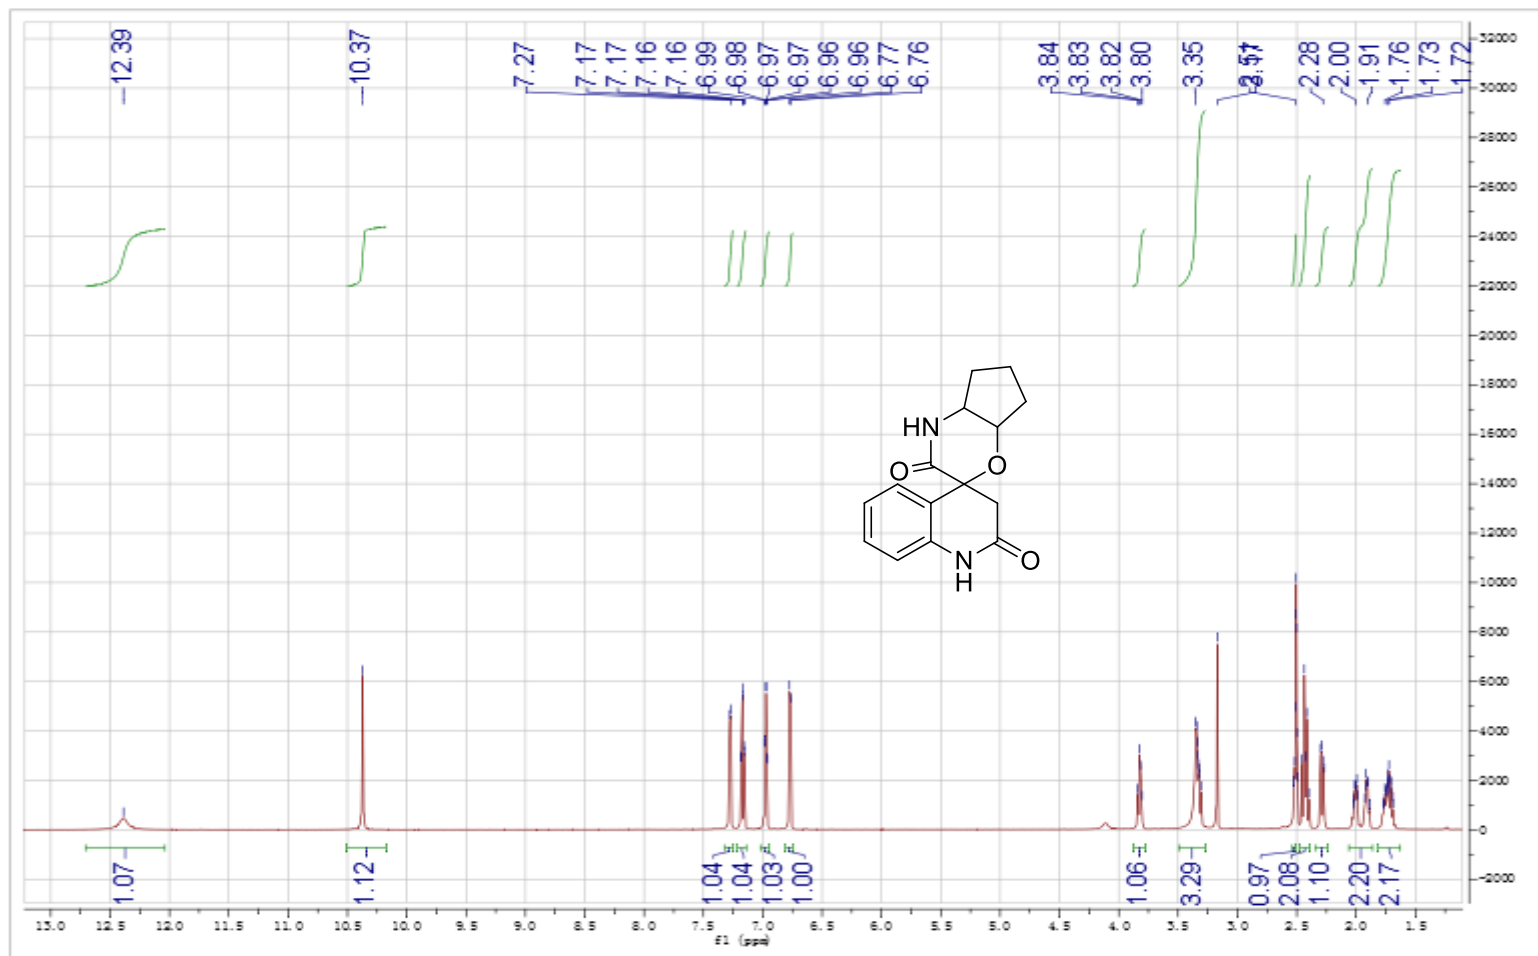

**Figure S19.** The  $^1\text{H}$  NMR spectrum of **3a/3b** (in  $\text{DMSO-}d_6$ )



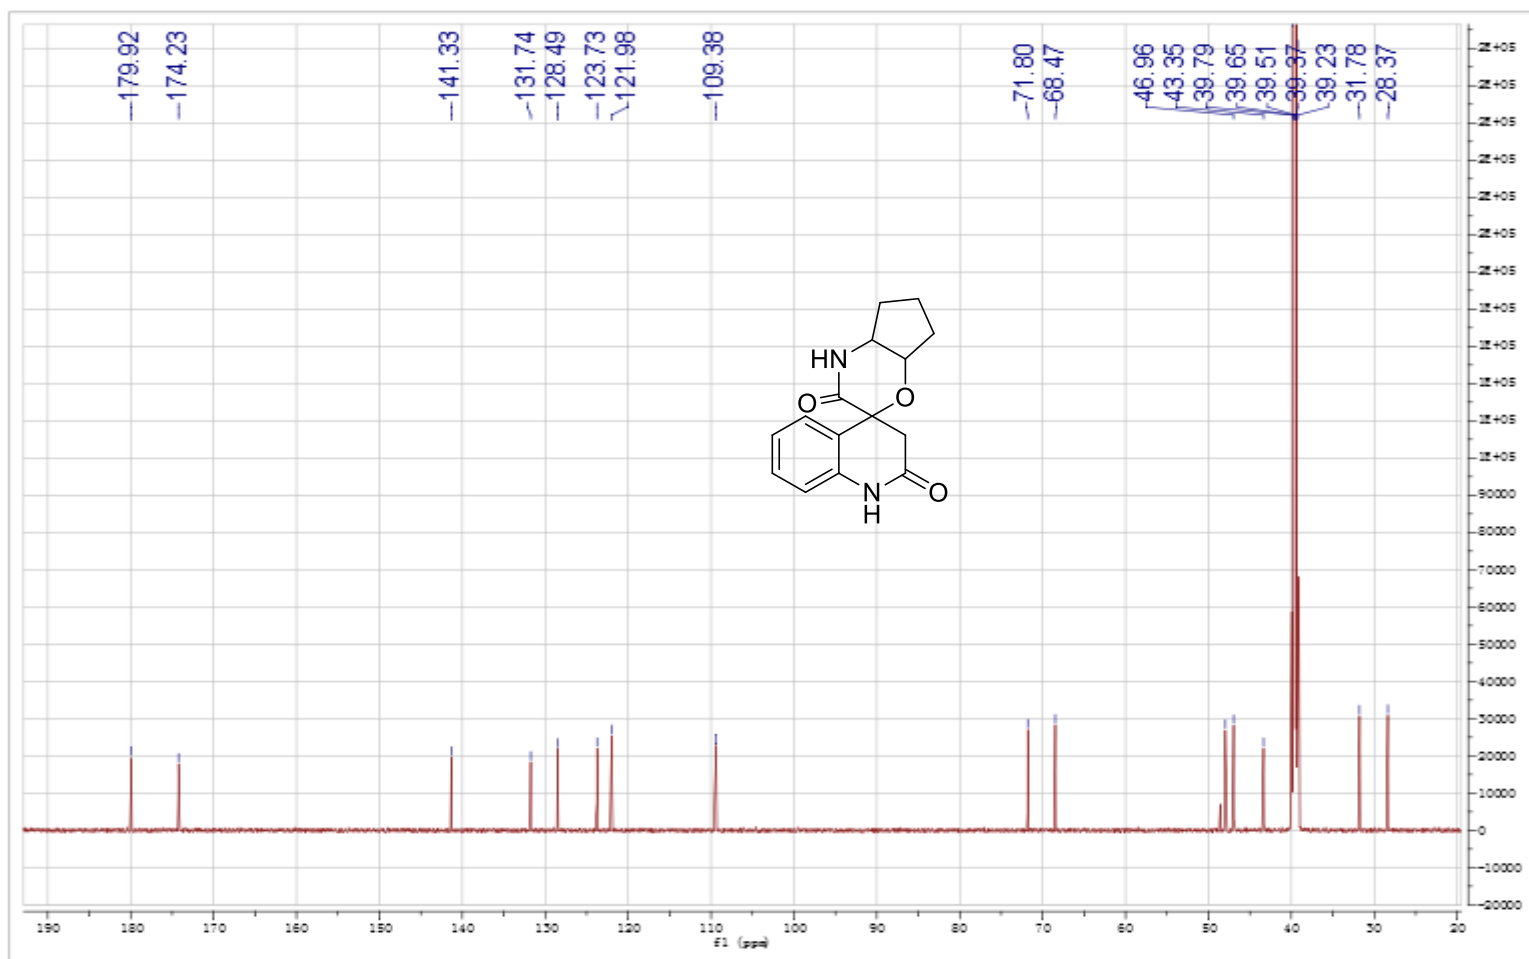

Figure S20. The  $^{13}\text{C}$  NMR spectrum of **3a/3b** (in  $\text{DMSO-}d_6$ )

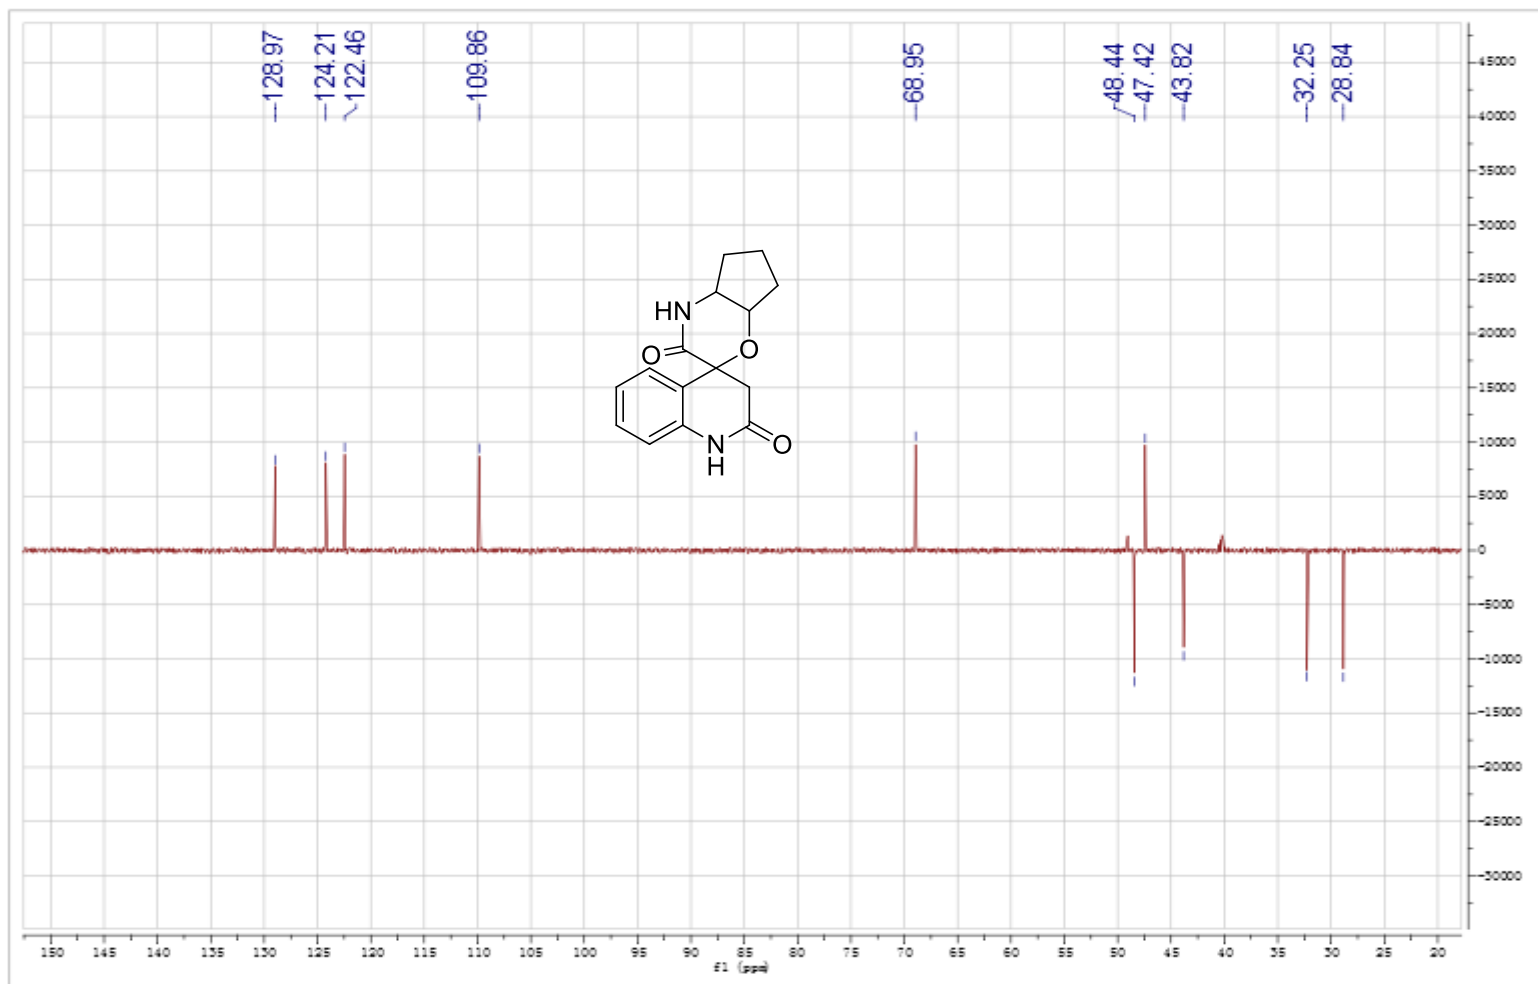

**Figure S21.** The DEPT 135° spectrum of **3a/3b** (in DMSO-*d*<sub>6</sub>)

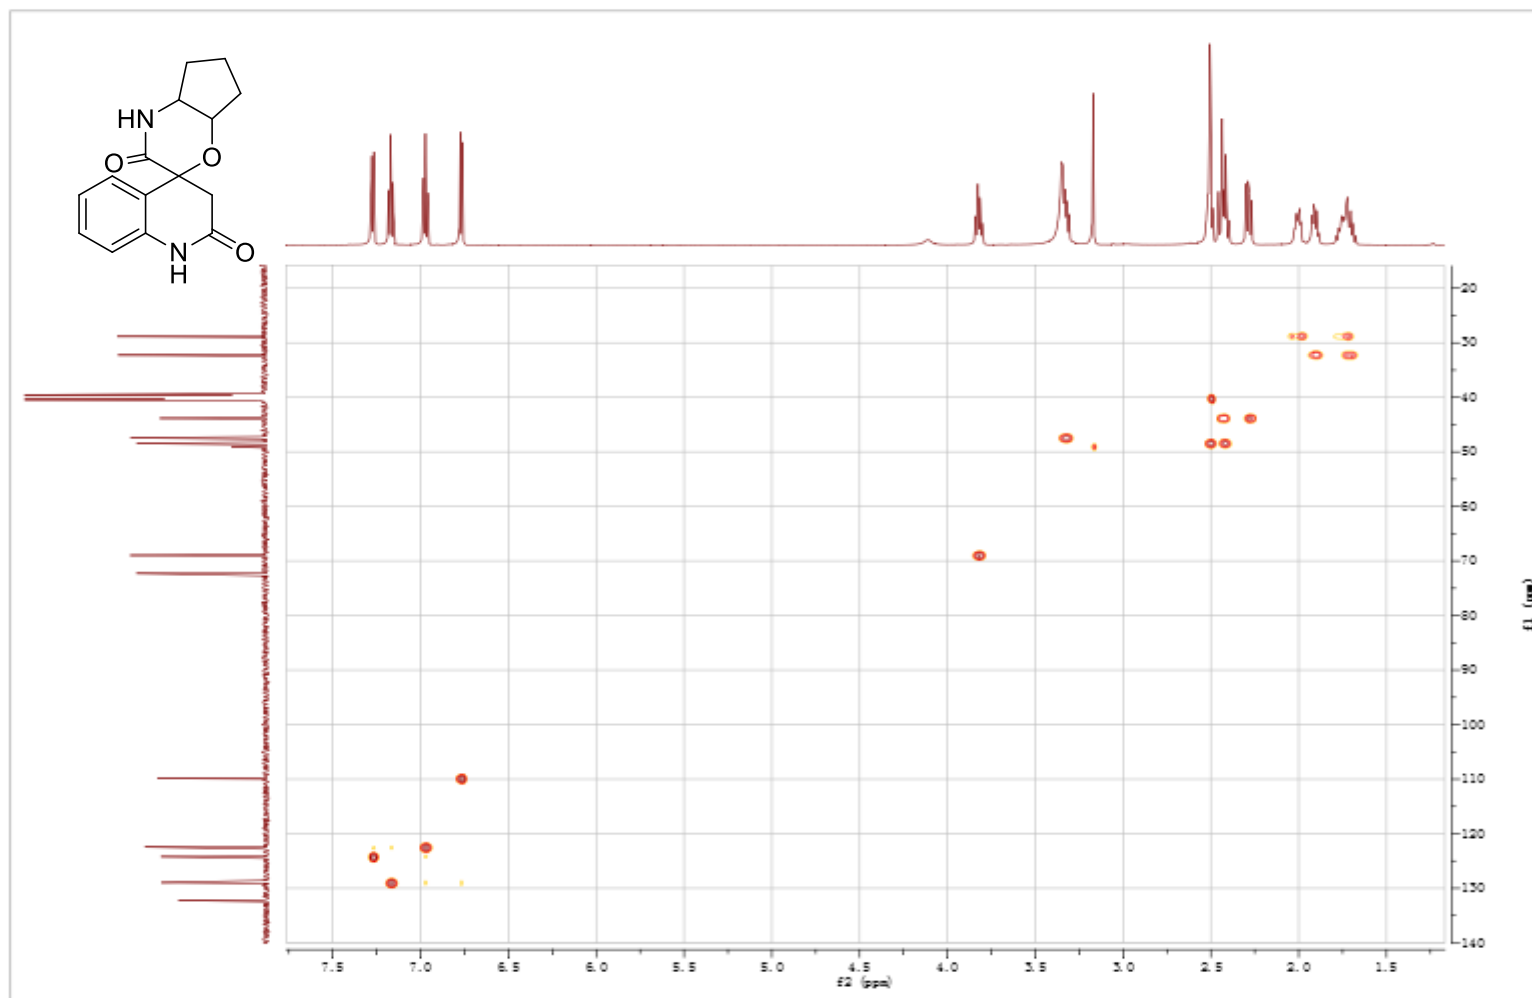

**Figure S22.** The HSQC spectrum of **3a/3b** (in DMSO-*d*<sub>6</sub>)

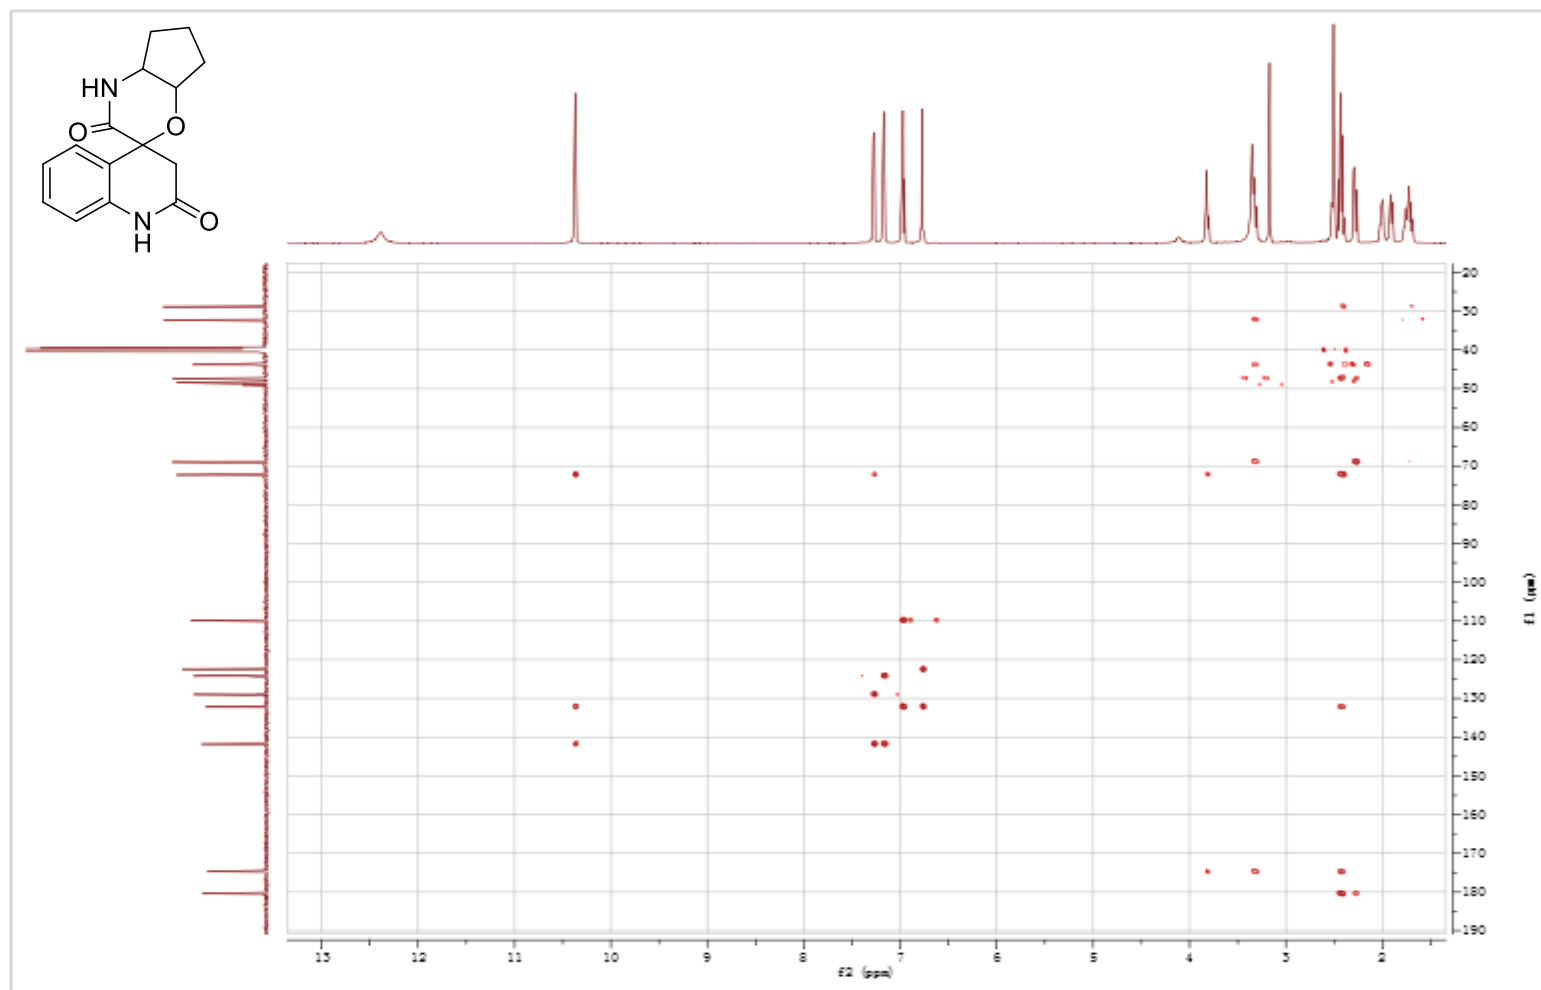

**Figure S23.** The HMBC spectrum of **3a/3b** (in DMSO-*d*<sub>6</sub>)

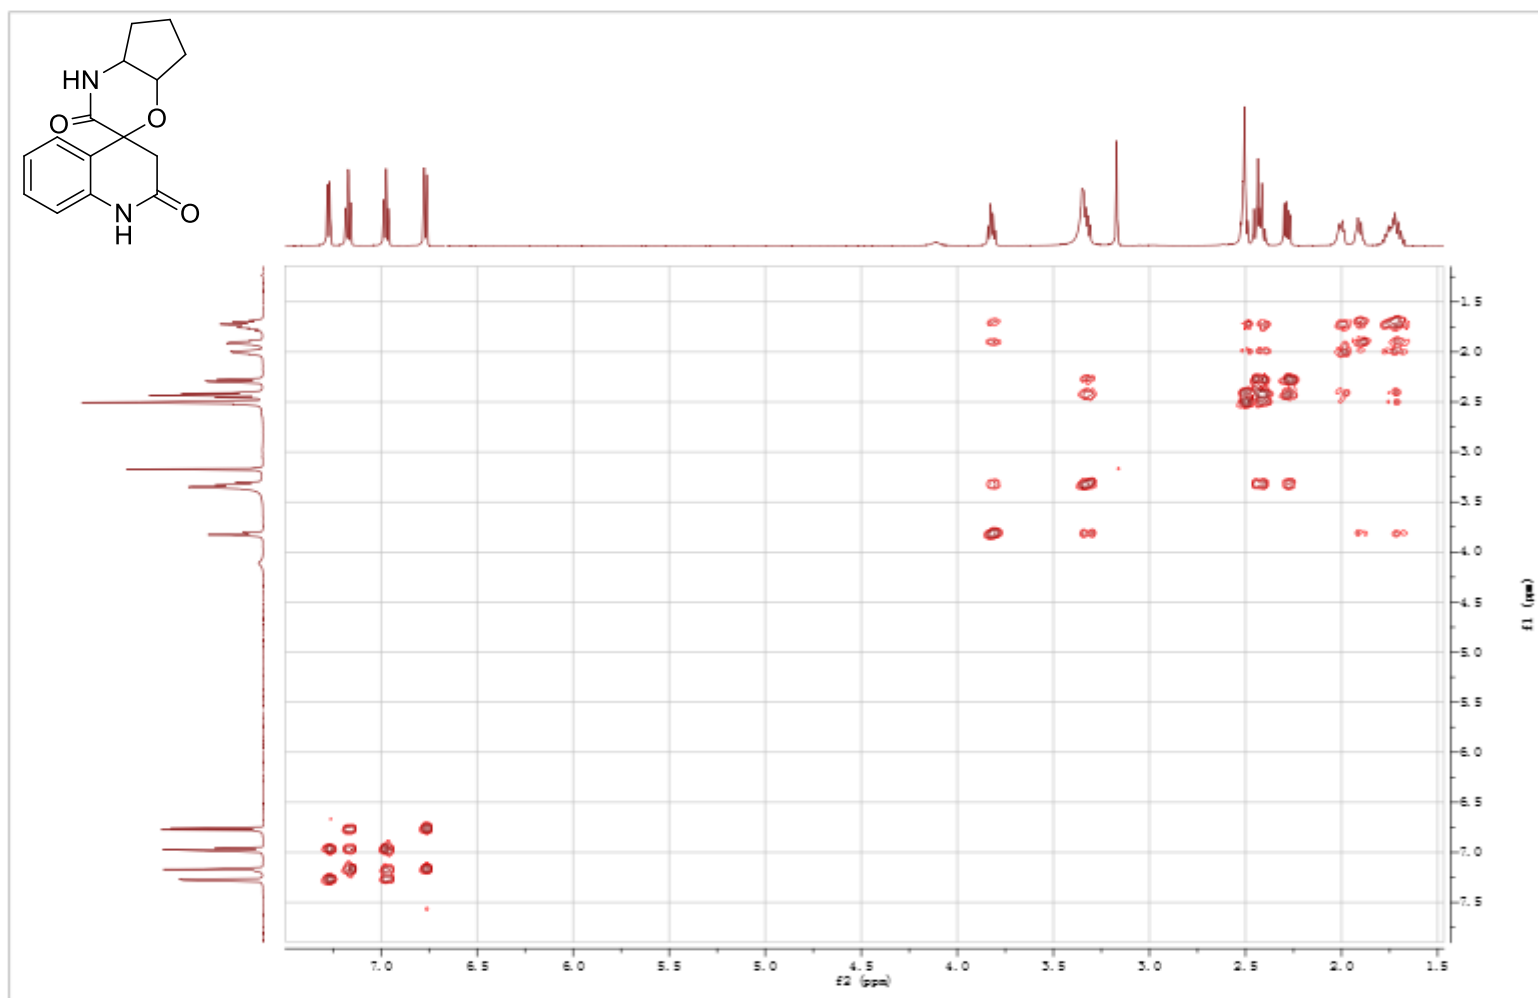

**Figure S24.** The  $^1\text{H}$ - $^1\text{H}$  COSY spectrum of **3a/3b** (in  $\text{DMSO-}d_6$ )

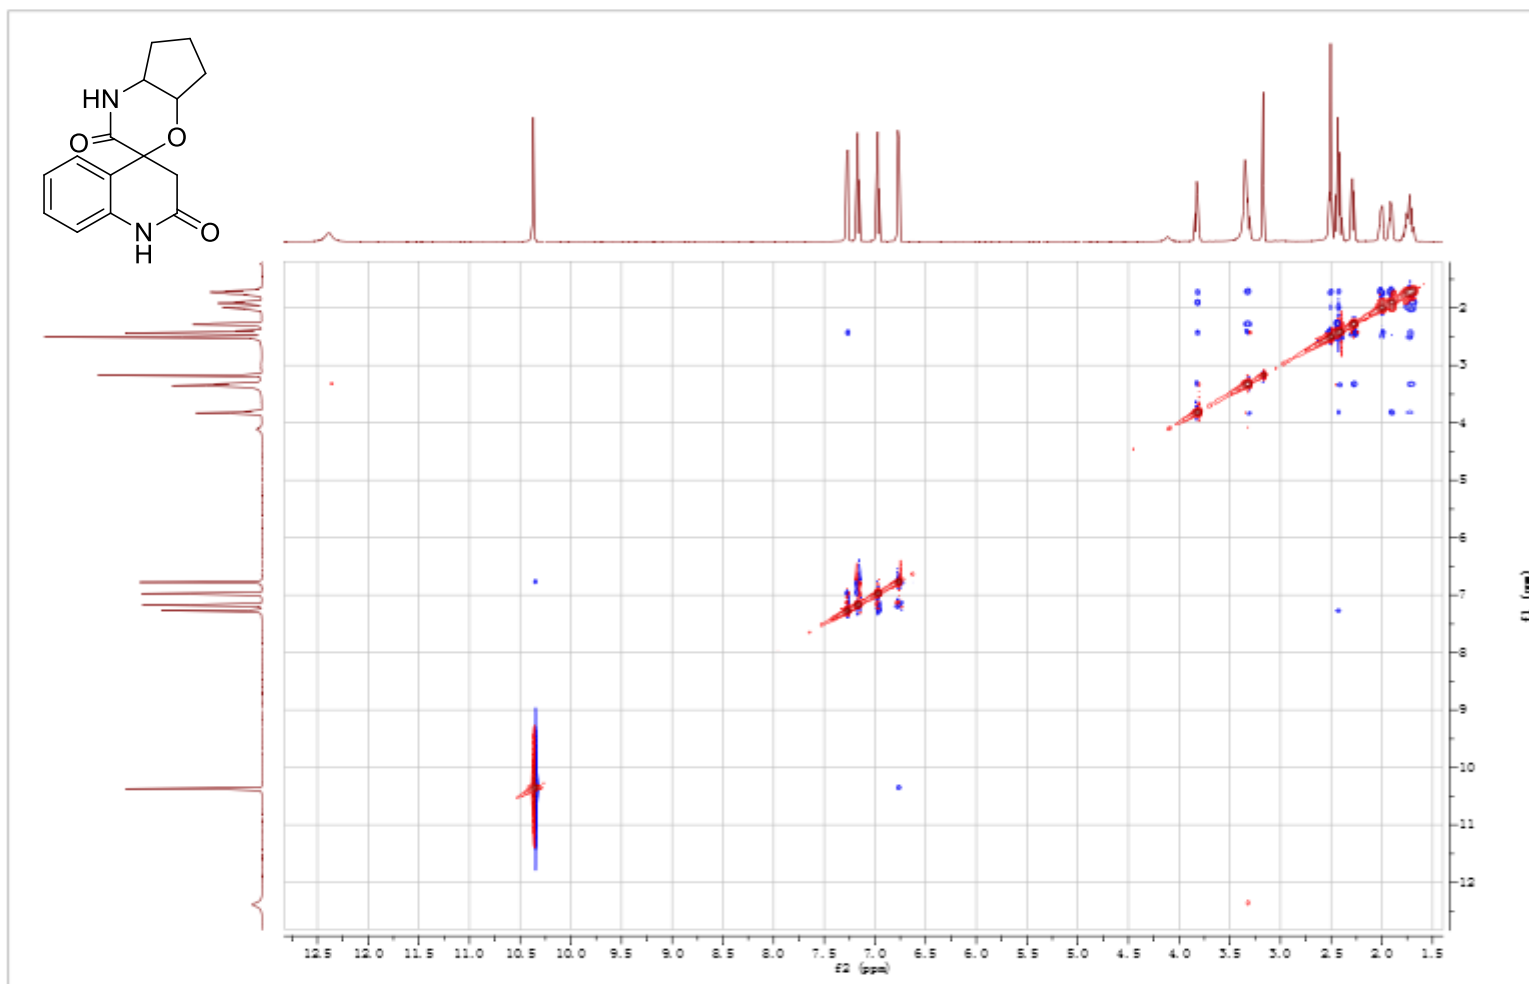

**Figure S25.** The ROESY spectrum of **3a/3b** (in DMSO-*d*<sub>6</sub>)

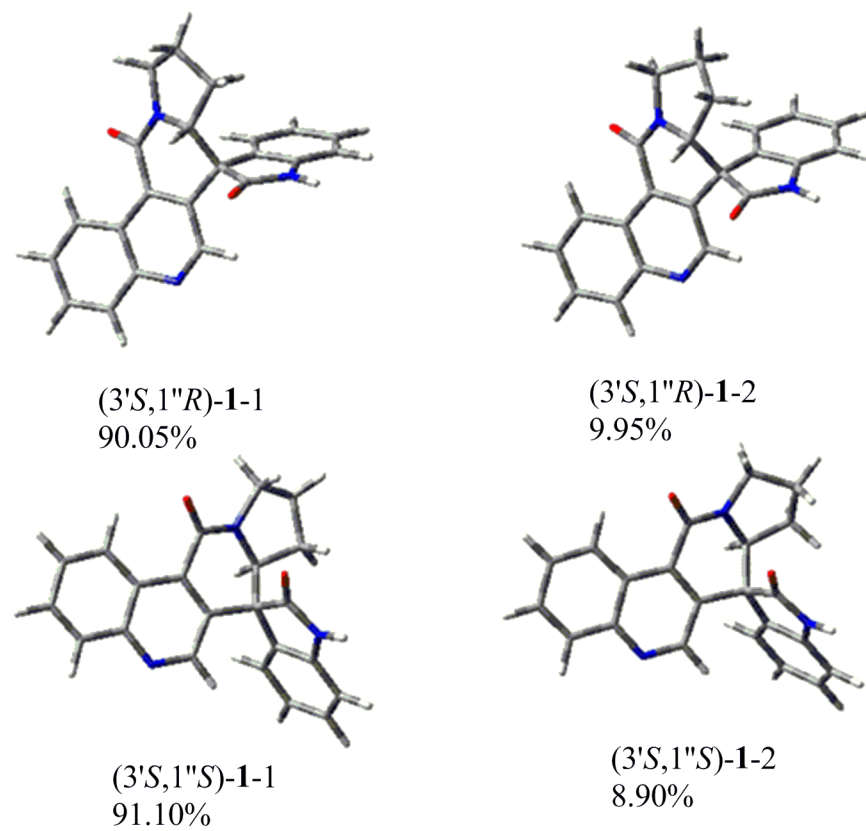

**Figure S26.** b3lyp/6-31g(d) optimized lowest energy conformers for (3'S,2''R)-1 and (3'S,2''S)-1 and their equilibrium populations

The experimental ECD spectrum of **1a** (red line) and **1b** (blue line) and the calculated ECD spectrum of (3'S,2''R)-**1** (red short dash), (3'R,2''S)-**1** (blue short dash), (3'S,2''S)-**1** (green short dash) and (3'R,2''R)-**1** (light blue short dash). The calculated ECD (excited states 30) spectrum were plotted as sums of Gaussians 09 with a 0.22 eV exponential half-width using the program Specdis 1.62, and the UV shifted was 3 nm.

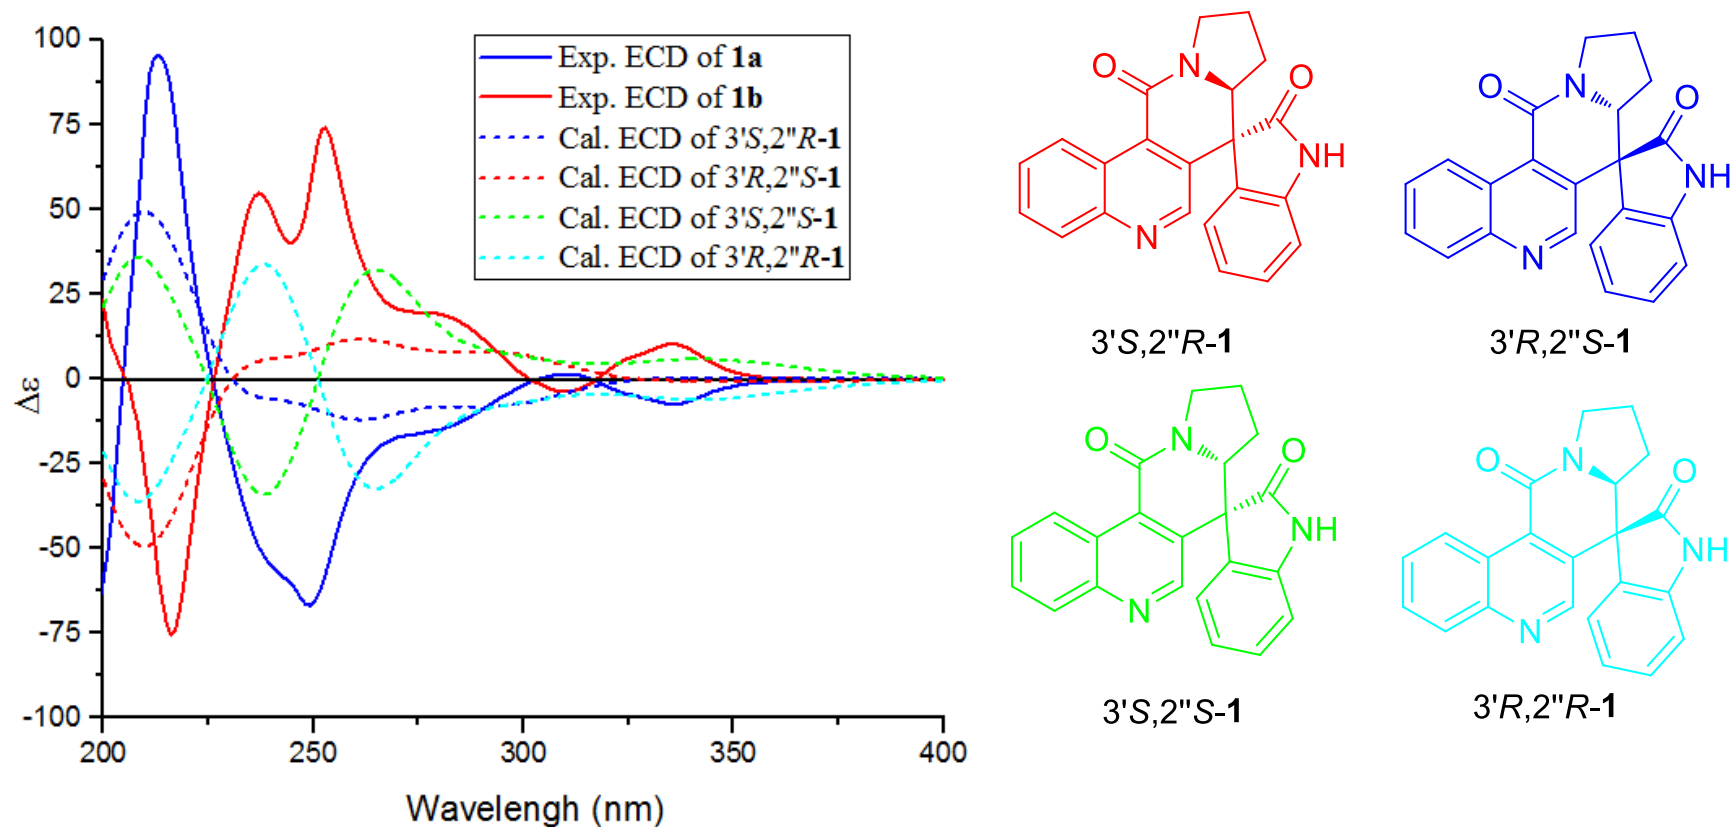

**Figure S27.** Experimental and calculated ECD spectrum of **1**



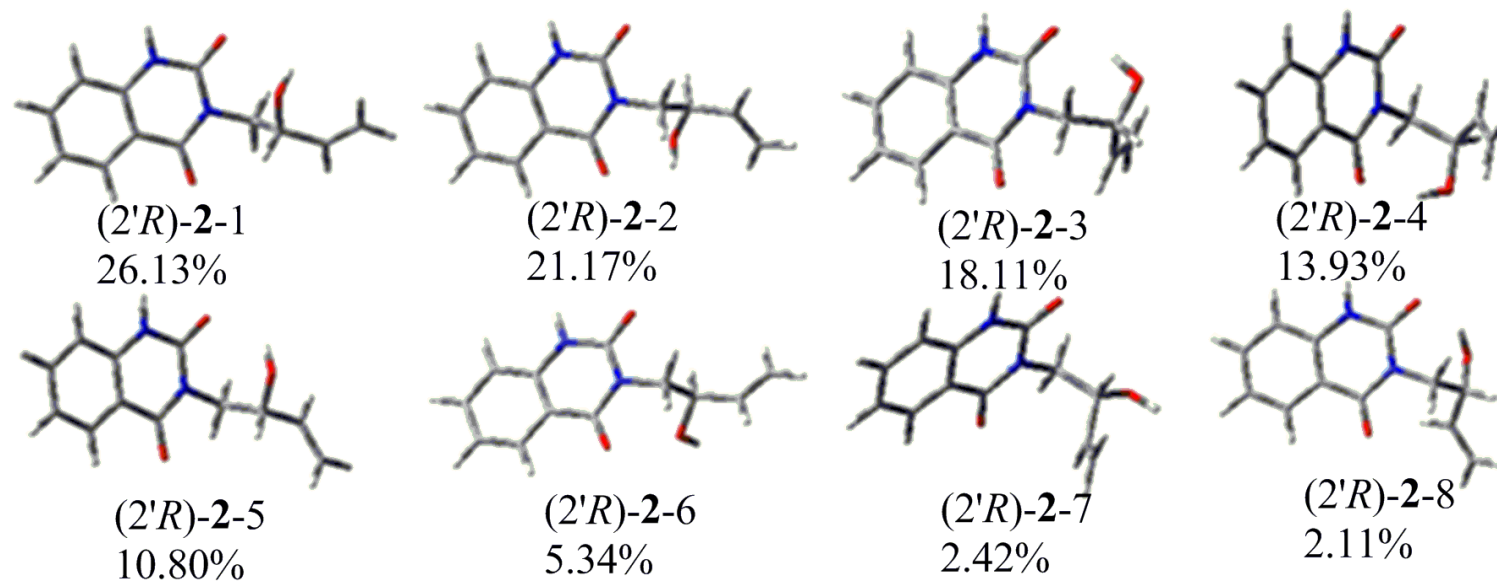

**Figure S28.** b3lyp/6-31g(d) optimized lowest energy conformers for (2'R)-2 and their equilibrium populations

The experimental ECD spectrum of **2a** (red line) and **2b** (black line) and the calculated ECD spectrum of (2'*R*)-**2** (red short dash) and (2'*S*)-**2** (black short dash). The calculated ECD (excited states 30) spectrum were plotted as sums of Gaussians 09 with a 0.16 eV exponential half-width using the program Specdis 1.62, and the UV shifted was 7 nm.

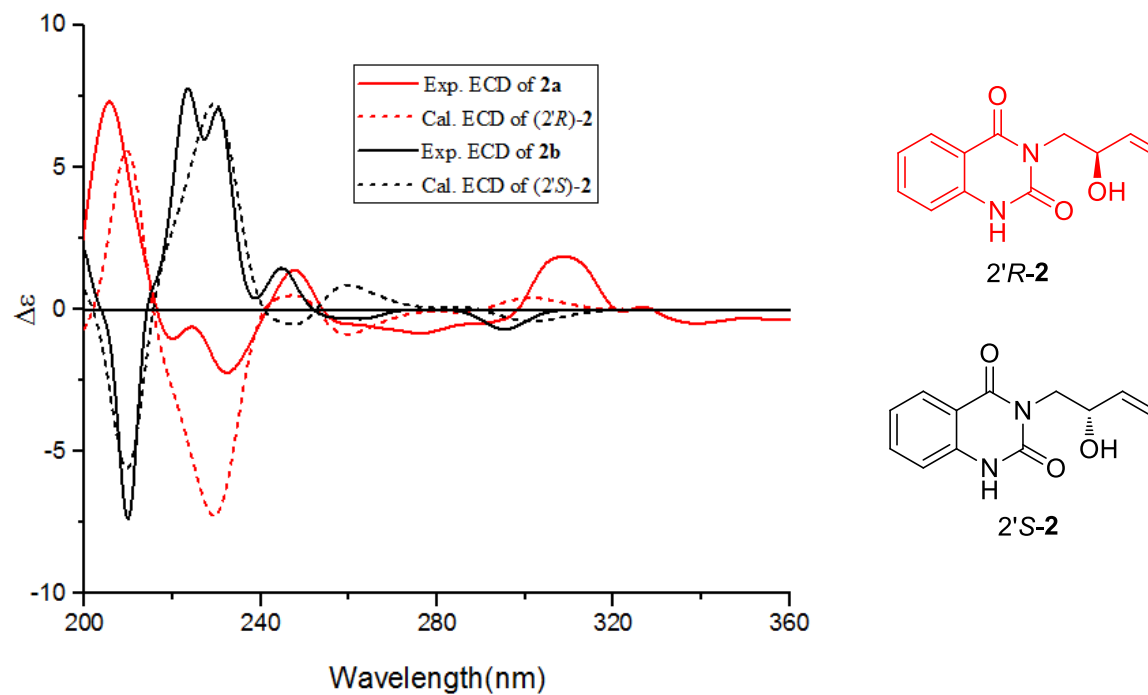

**Figure S29.** Experimental and calculated ECD spectrum of **2**

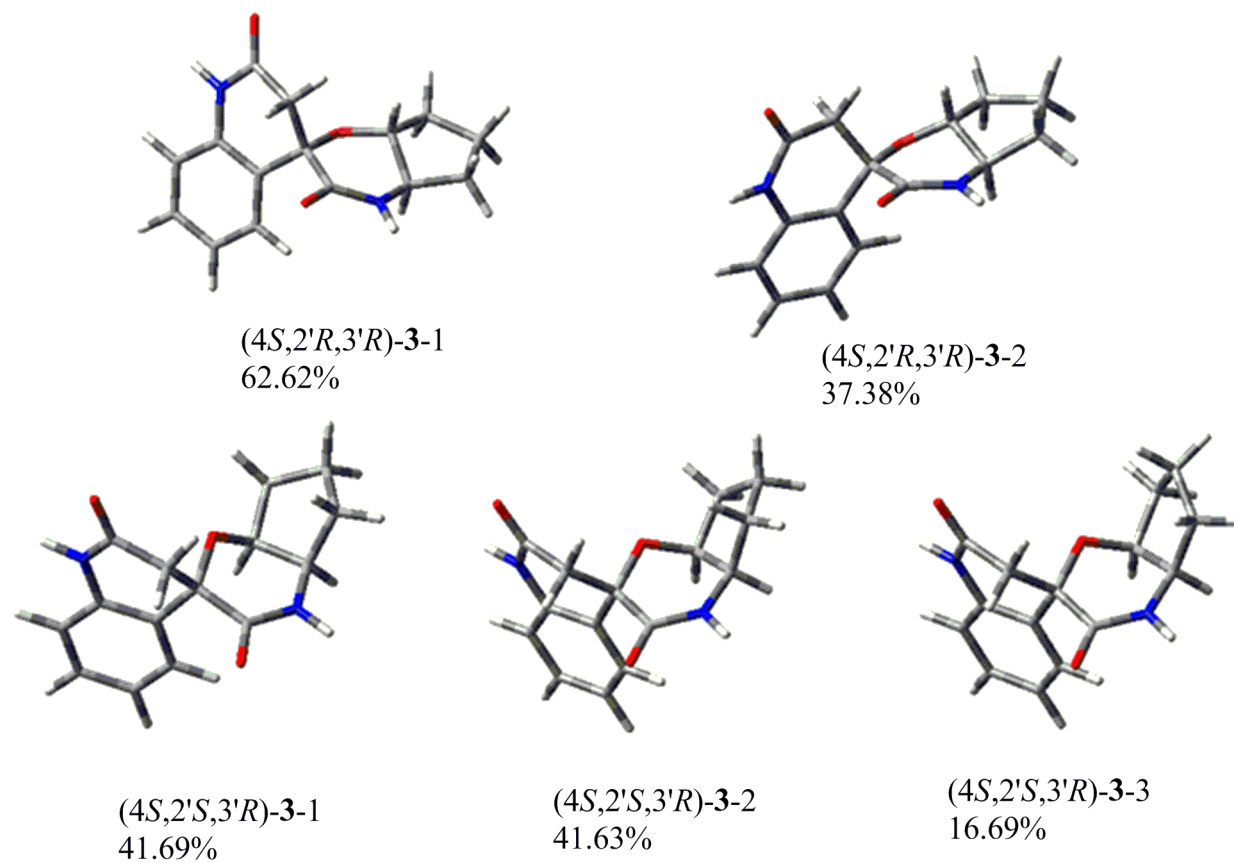

**Figure S30.** b3lyp/6-31g(d) optimized lowest energy conformers for (4*S*,2'*R*,3'*R*)-3 and (4*S*,2'*S*,3'*R*)-3 and their equilibrium populations

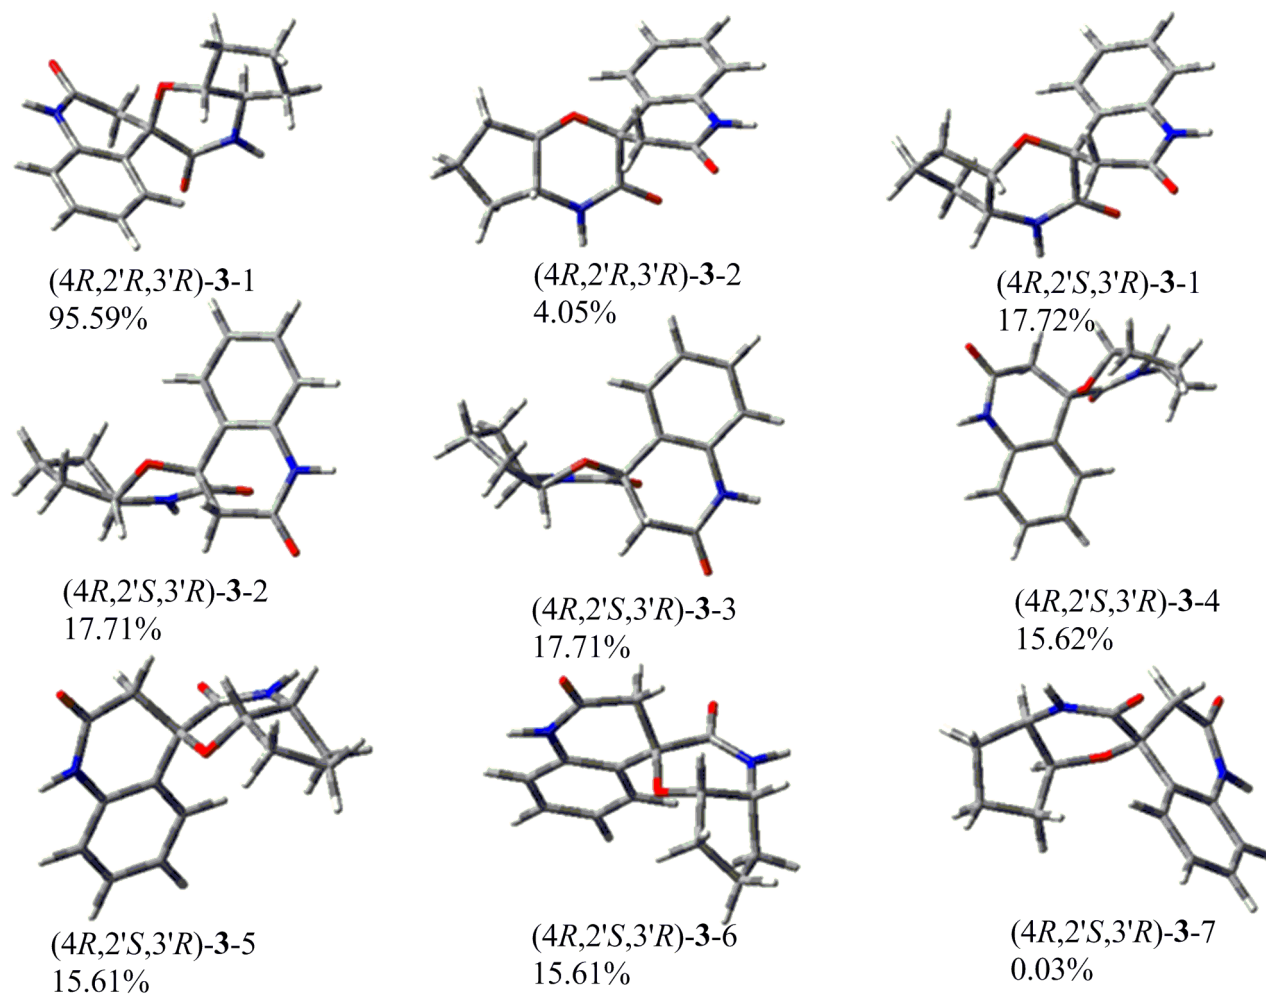

**Figure S31.** b3lyp/6-31g(d) optimized lowest energy conformers for (4*R*,2'*R*,3'*R*)-3 and (4*R*,2'*S*,3'*R*)-3 and their equilibrium populations

The experimental ECD spectrum of **3a** (red line) and **3b** (blue line) and the calculated ECD spectrum of (4*S*,2'*R*,3'*R*)-**3** (red short dash), (4*R*,2'*S*,3'*S*)-**3** (blue short dash), (4*S*,2'*S*,3'*R*)-**3** (green short dash) and (4*R*,2'*R*,3'*S*)-**3** (light blue short dash). The calculated ECD (excited states 30) spectrum were plotted as sums of Gaussians 09 with a 0.28 eV exponential half-width using the program Specdis 1.62, and the UV shifted was 2 nm.

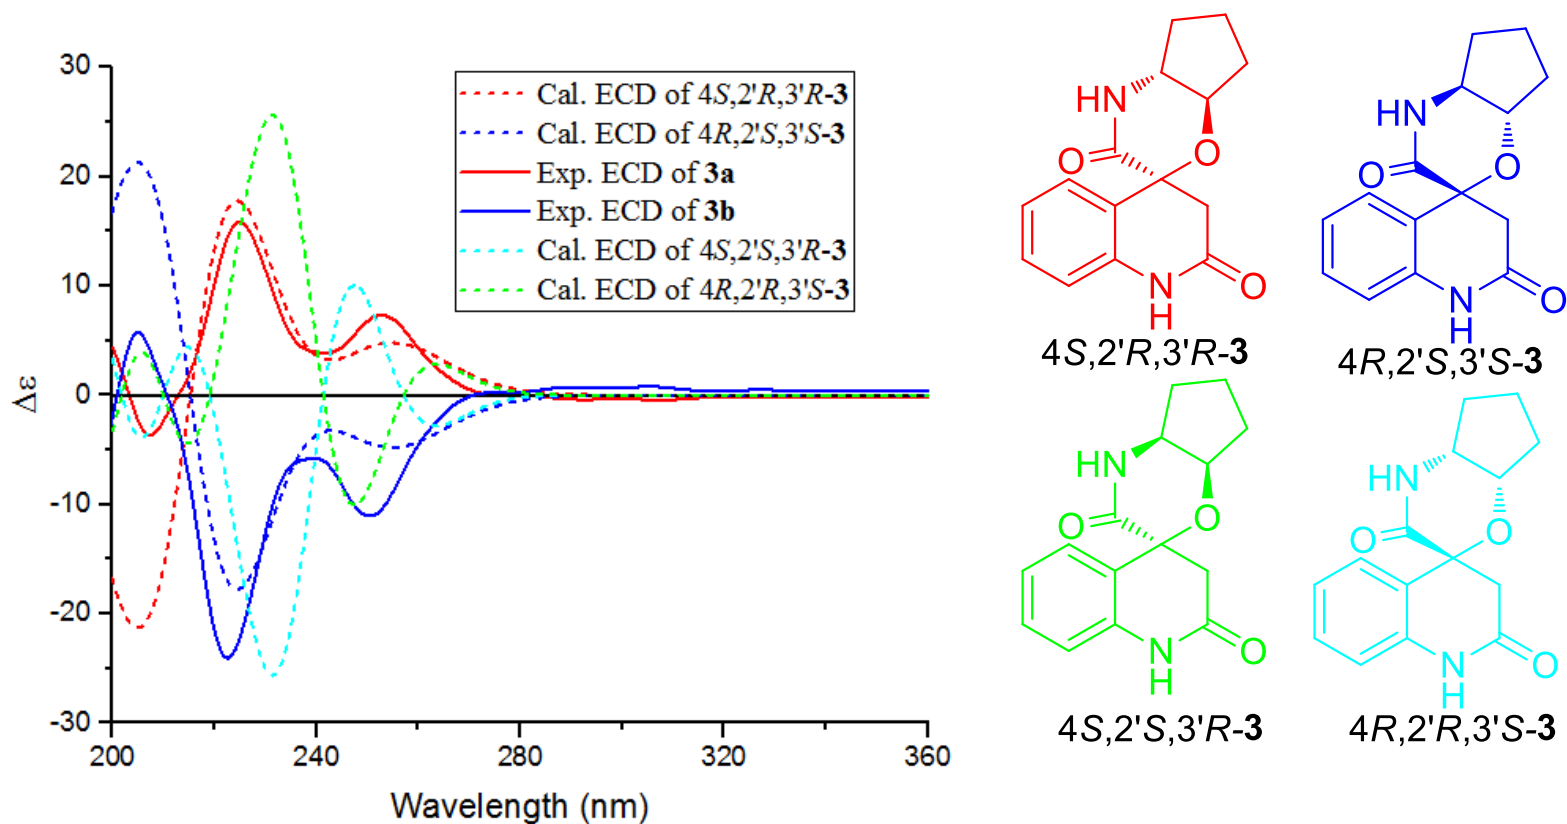

**Figure S32.** Experimental and calculated ECD spectrum of **3**

The experimental ECD spectrum of **3a** (red line) and **3b** (blue line) and the calculated ECD spectrum of (4*R*,2'*R*,3'*R*)-**3** (red short dash), (4*S*,2'*S*,3'*S*)-**3** (blue short dash), (4*R*,2'*S*,3'*R*)-**3** (green short dash) and (4*S*,2'*R*,3'*S*)-**3** (light blue short dash). The calculated ECD (excited states 30) spectrum were plotted as sums of Gaussians 09 with a 0.28 eV exponential half-width using the program Specdis 1.62, and the UV shifted was 2 nm.

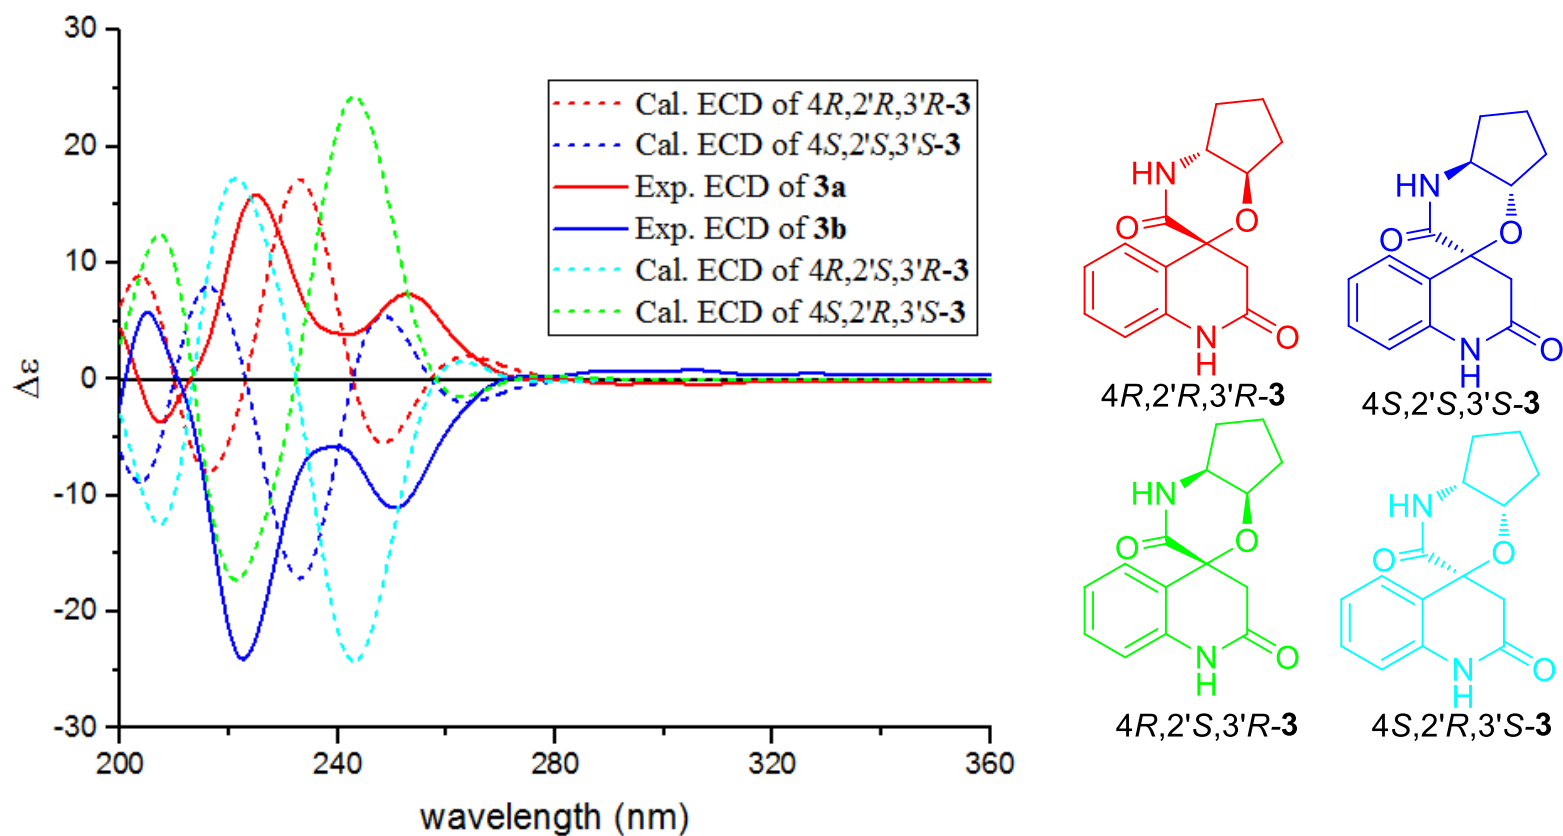

**Figure S33.** Experimental and calculated ECD spectrum of **3**

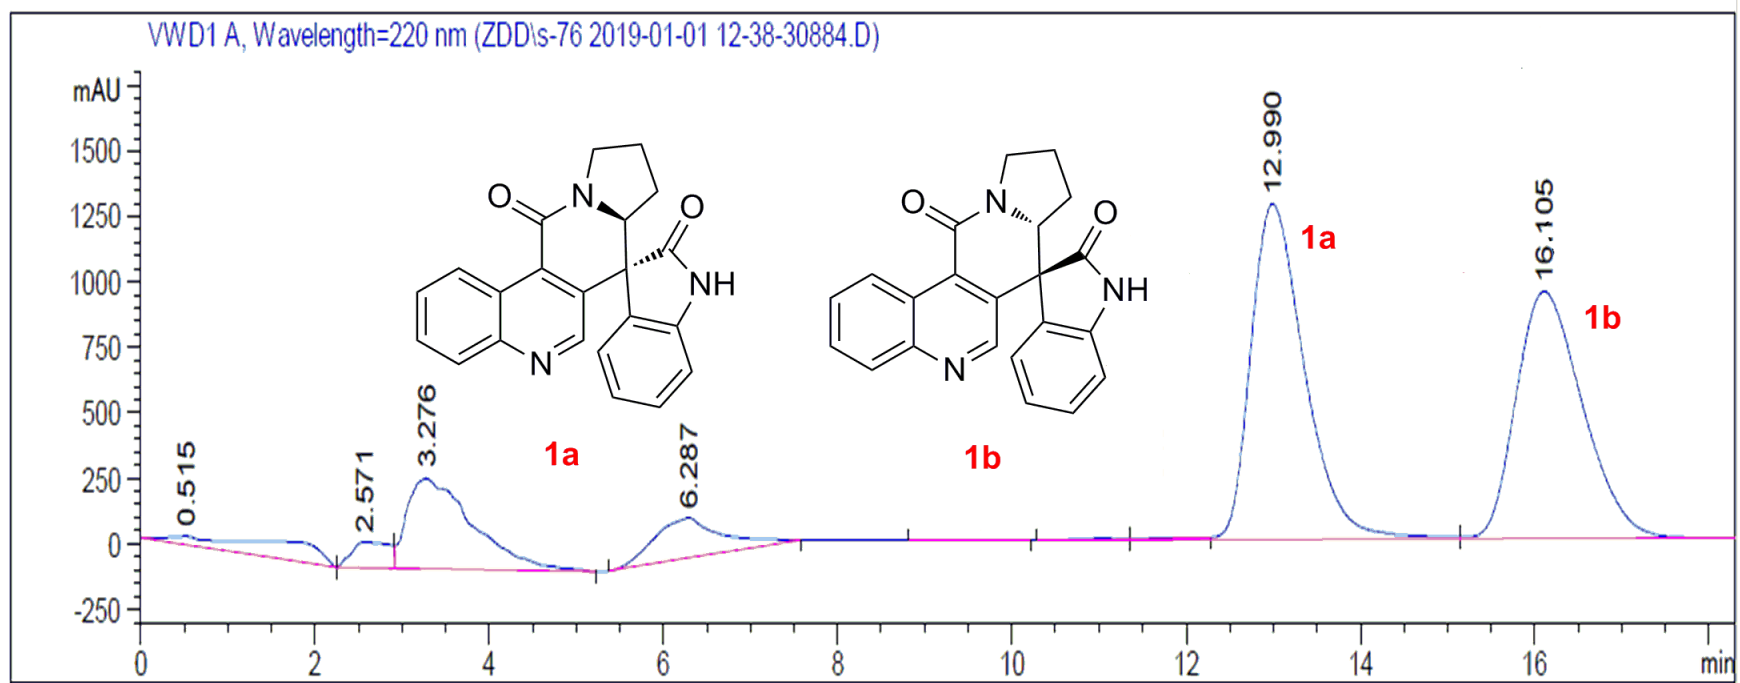

Figure S34. Chiral separation chromatography of **1**

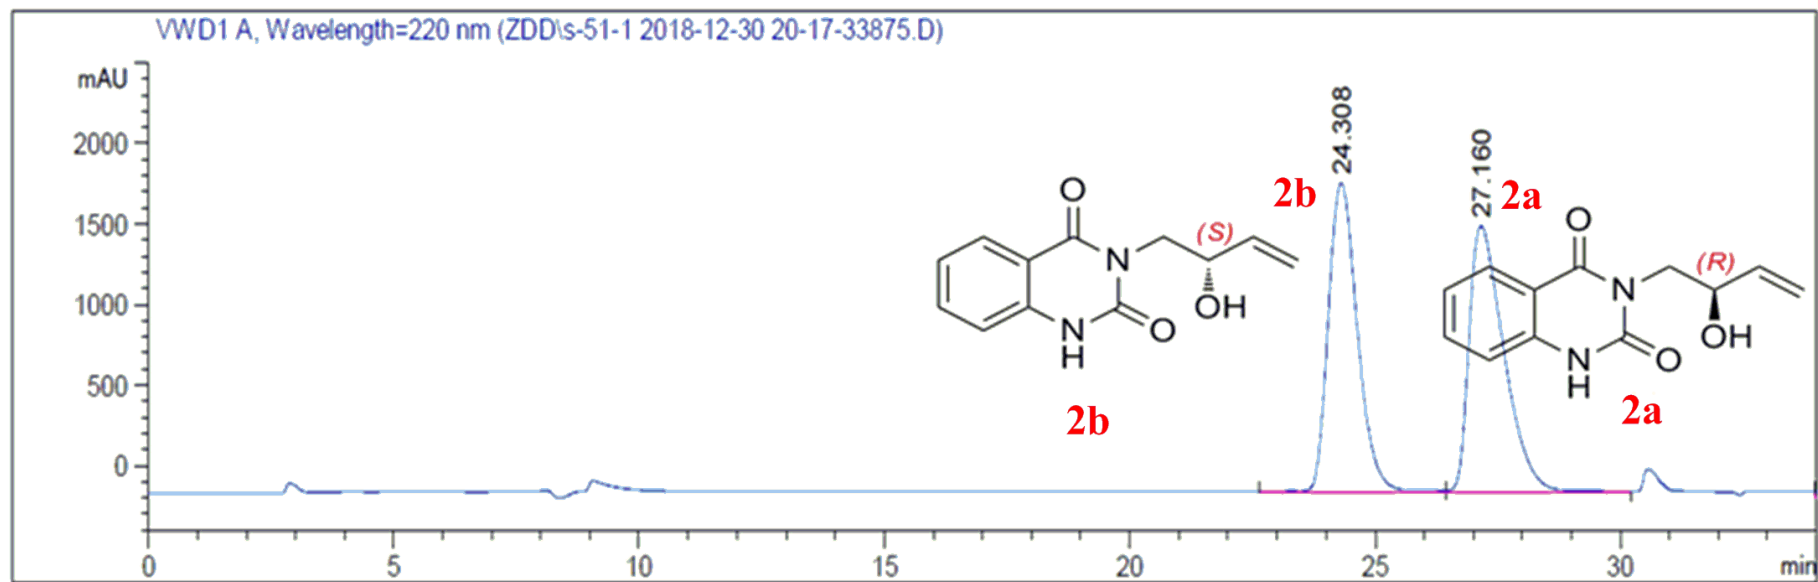

Figure S35. Chiral separation chromatography of 2



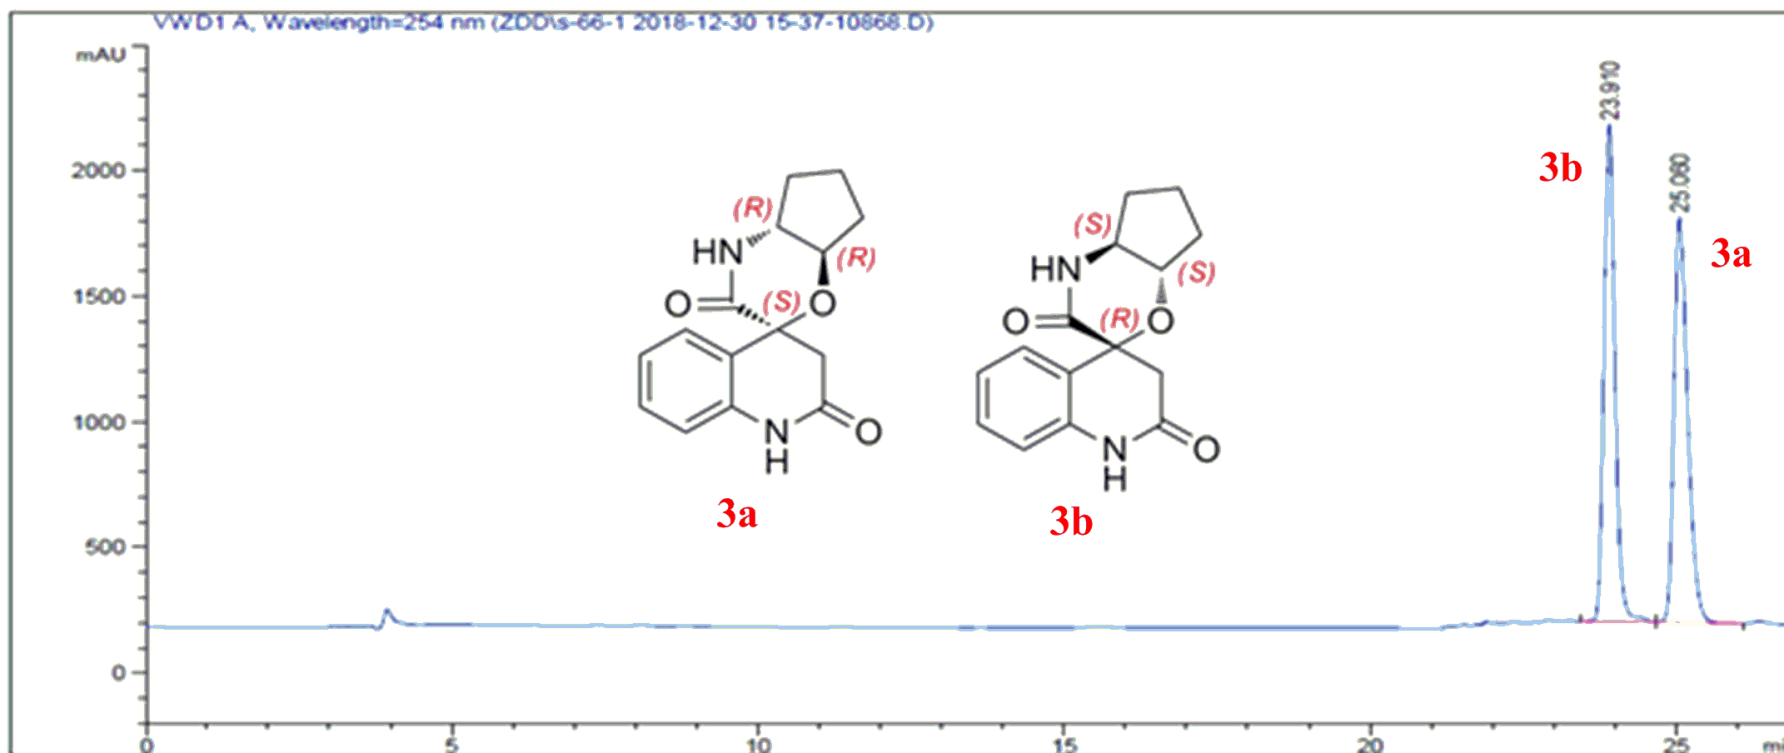

Figure S36. Chiral separation chromatography of 3

---

## 22019060549S\_0m

Table 1 Crystal data and structure refinement for 22019060549S\_0m.

|                                             |                                                               |
|---------------------------------------------|---------------------------------------------------------------|
| Identification code                         | 22019060549S_0m                                               |
| Empirical formula                           | C <sub>25</sub> H <sub>27</sub> N <sub>4</sub> O <sub>7</sub> |
| Formula weight                              | 495.50                                                        |
| Temperature/K                               | 130.0                                                         |
| Crystal system                              | orthorhombic                                                  |
| Space group                                 | P2 <sub>1</sub> 2 <sub>1</sub> 2 <sub>1</sub>                 |
| a/Å                                         | 7.7008(2)                                                     |
| b/Å                                         | 13.3435(4)                                                    |
| c/Å                                         | 23.1191(7)                                                    |
| α/°                                         | 90                                                            |
| β/°                                         | 90                                                            |
| γ/°                                         | 90                                                            |
| Volume/Å <sup>3</sup>                       | 2375.62(12)                                                   |
| Z                                           | 4                                                             |
| ρ <sub>calc</sub> /cm <sup>3</sup>          | 1.385                                                         |
| μ/mm <sup>-1</sup>                          | 0.856                                                         |
| F(000)                                      | 1044.0                                                        |
| Crystal size/mm <sup>3</sup>                | 0.19 × 0.08 × 0.05                                            |
| Radiation                                   | CuKα (λ = 1.54178)                                            |
| 2θ range for data collection/°              | 7.648 to 148.48                                               |
| Index ranges                                | -9 ≤ h ≤ 8, -15 ≤ k ≤ 16, -28 ≤ l ≤ 28                        |
| Reflections collected                       | 31880                                                         |
| Independent reflections                     | 4813 [R <sub>int</sub> = 0.0526, R <sub>sigma</sub> = 0.0284] |
| Data/restraints/parameters                  | 4813/367/347                                                  |
| Goodness-of-fit on F <sup>2</sup>           | 1.045                                                         |
| Final R indexes [I ≥ 2σ (I)]                | R <sub>1</sub> = 0.0537, wR <sub>2</sub> = 0.1582             |
| Final R indexes [all data]                  | R <sub>1</sub> = 0.0572, wR <sub>2</sub> = 0.1613             |
| Largest diff. peak/hole / e Å <sup>-3</sup> | 0.37/-0.37                                                    |
| Flack parameter                             | 0.15(7)                                                       |

---

Figure S37. Crystallographic data of **2b**

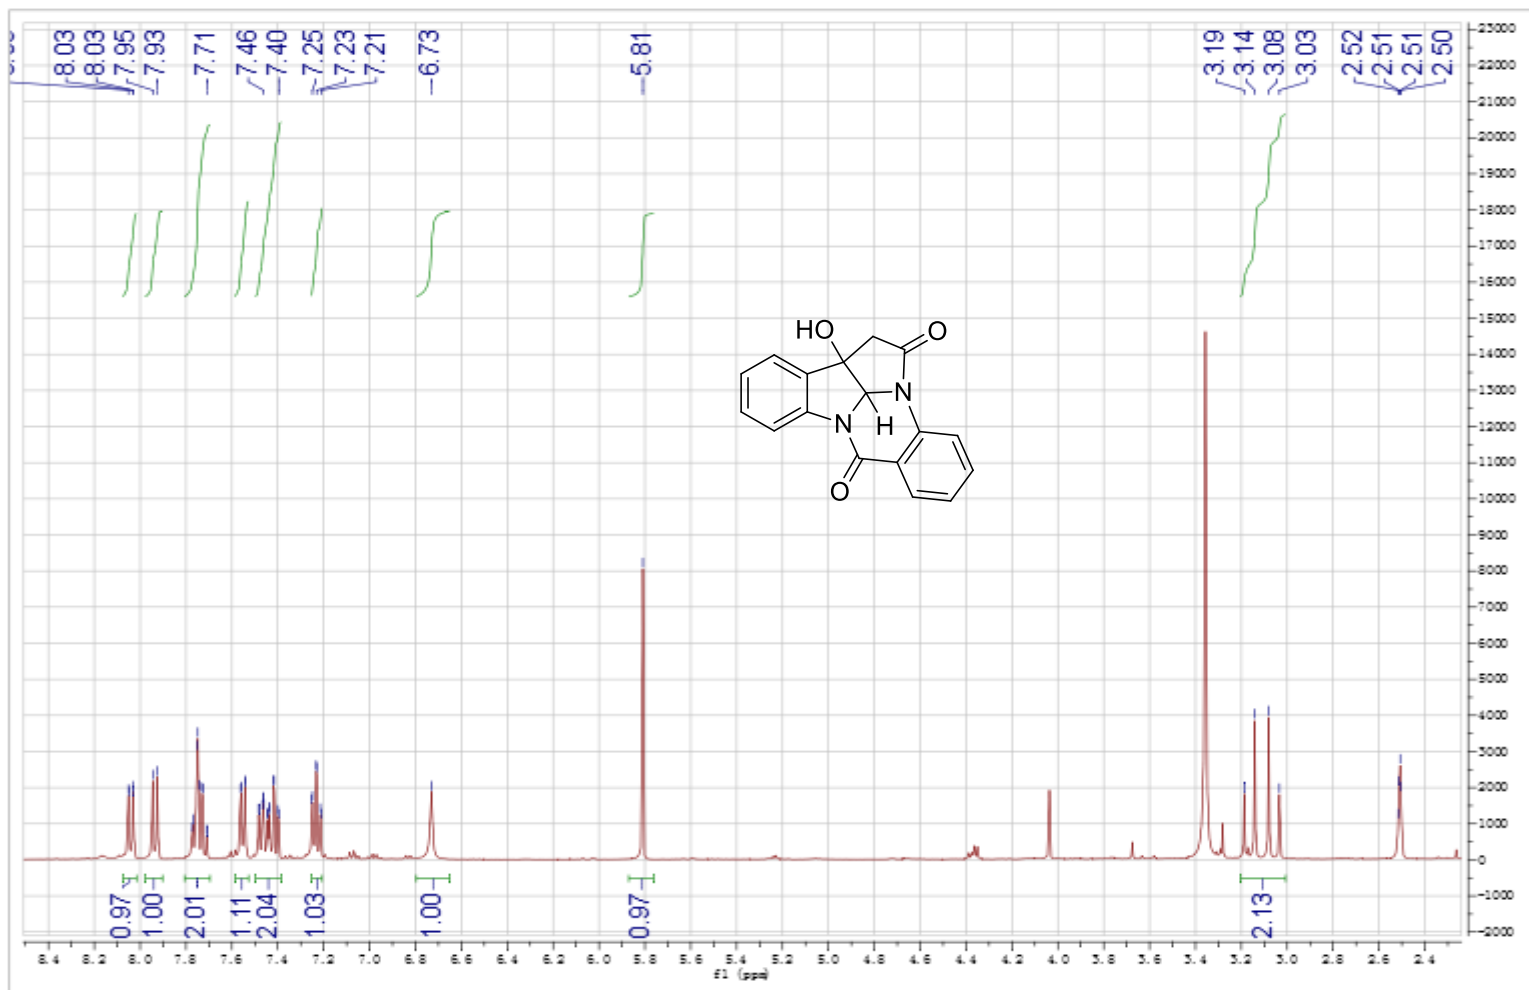

Figure S38. The <sup>1</sup>H NMR spectrum of **4a/4b** (in DMSO-*d*<sub>6</sub>)

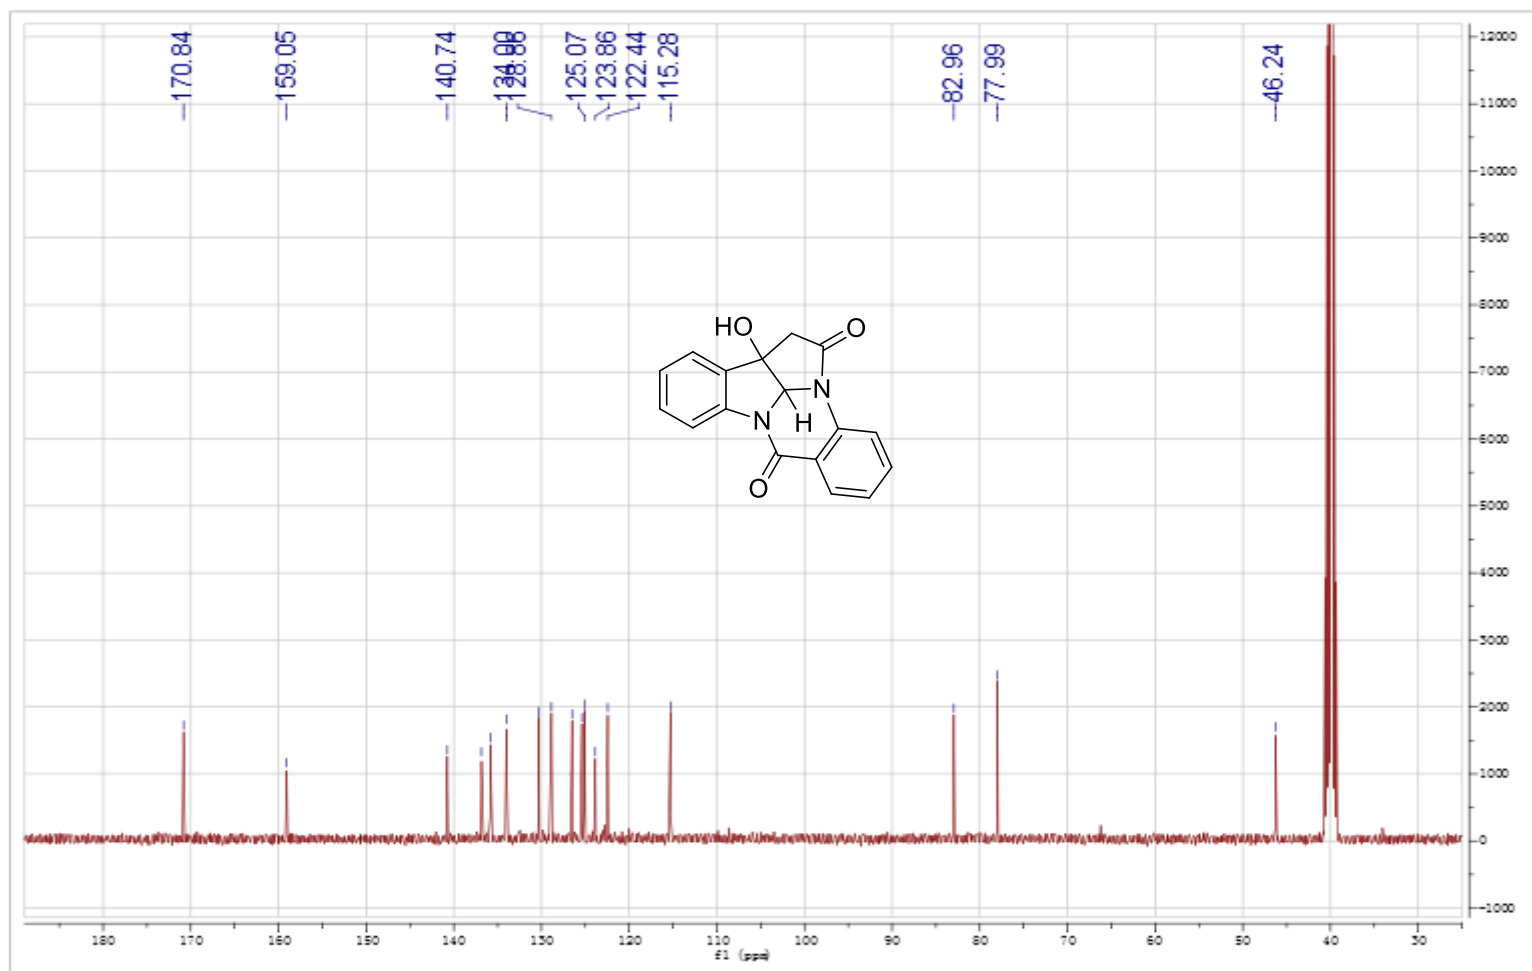

**Figure S39.** The  $^{13}\text{C}$  NMR spectrum of **4a/4b** (in  $\text{DMSO-}d_6$ )

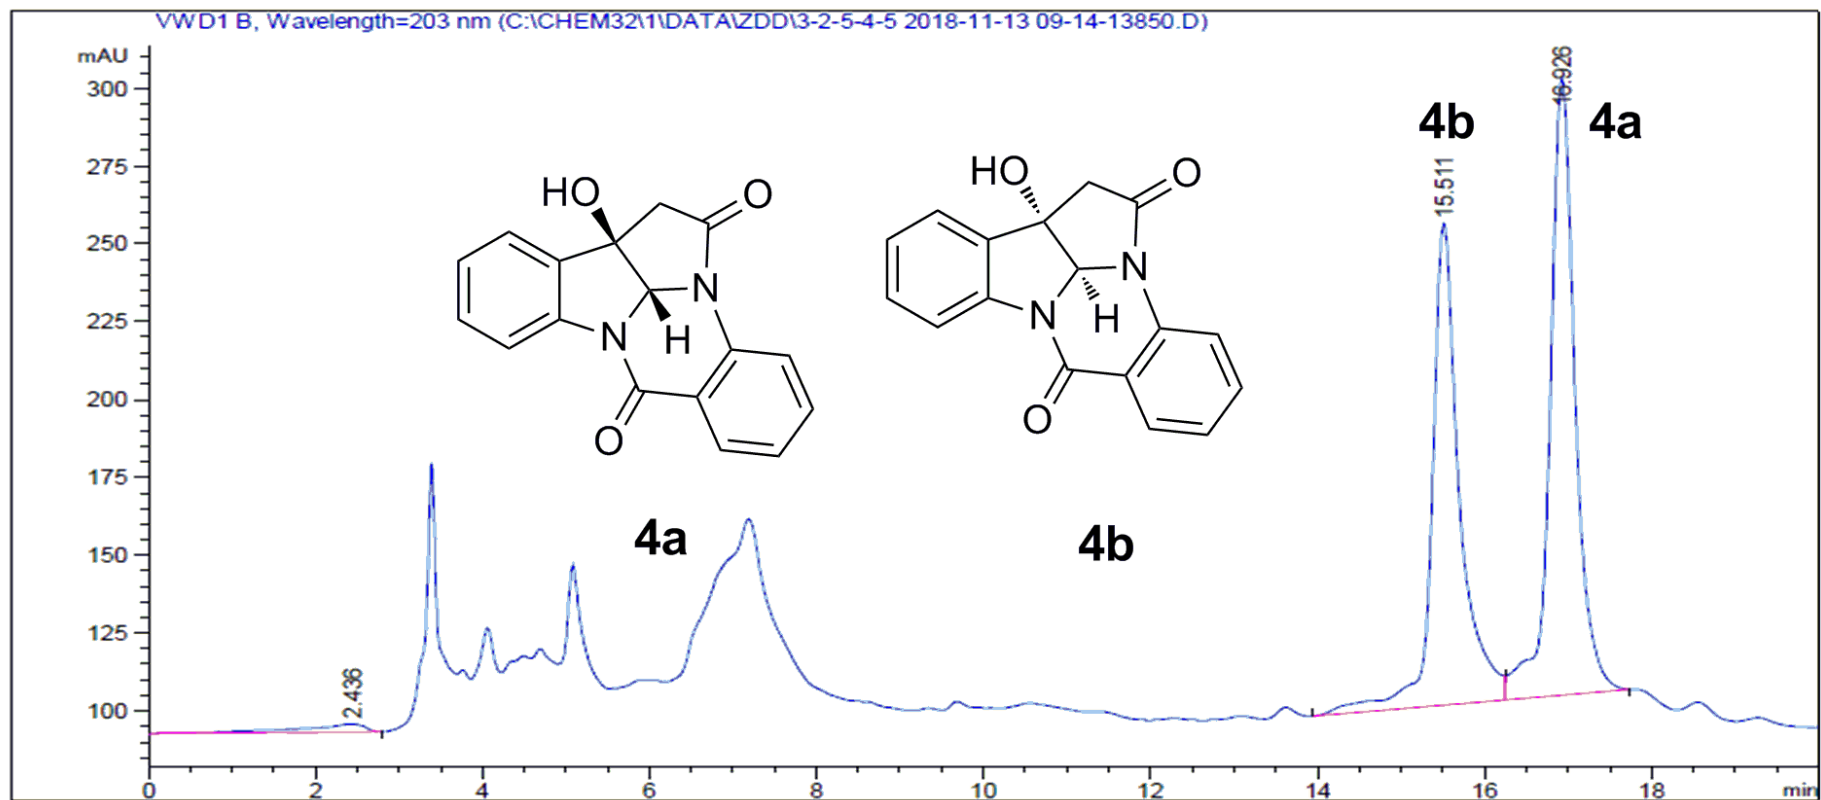

Figure S40. Chiral separation chromatography of 4

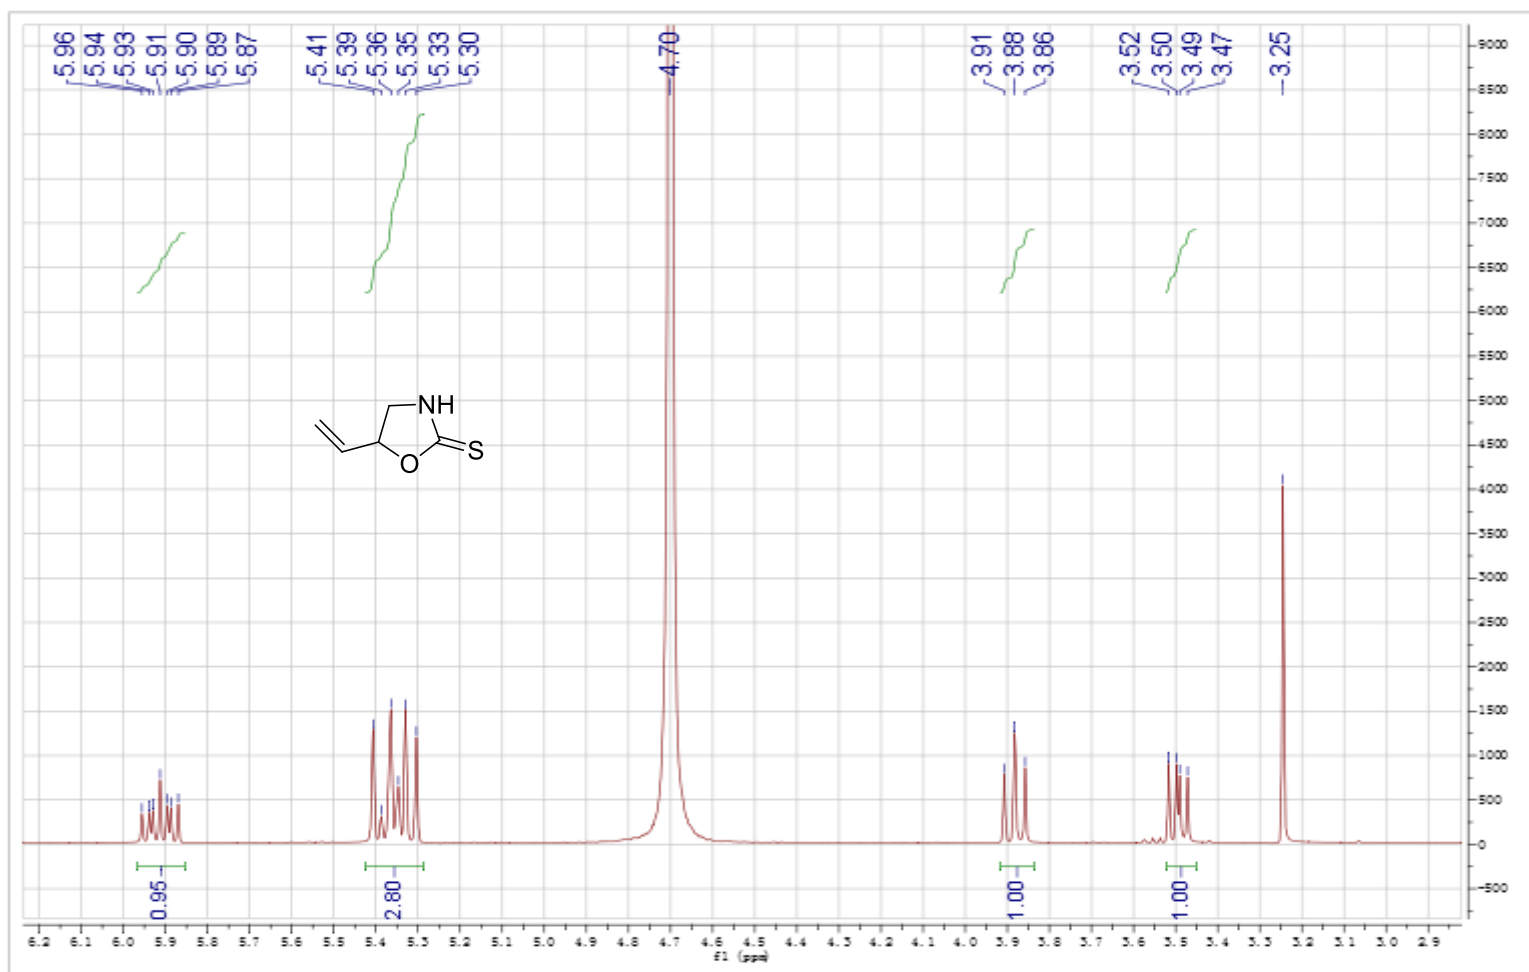

Figure S41. The  $^1\text{H}$  NMR spectrum of **1a/1b** (in  $\text{D}_2\text{O}$ )

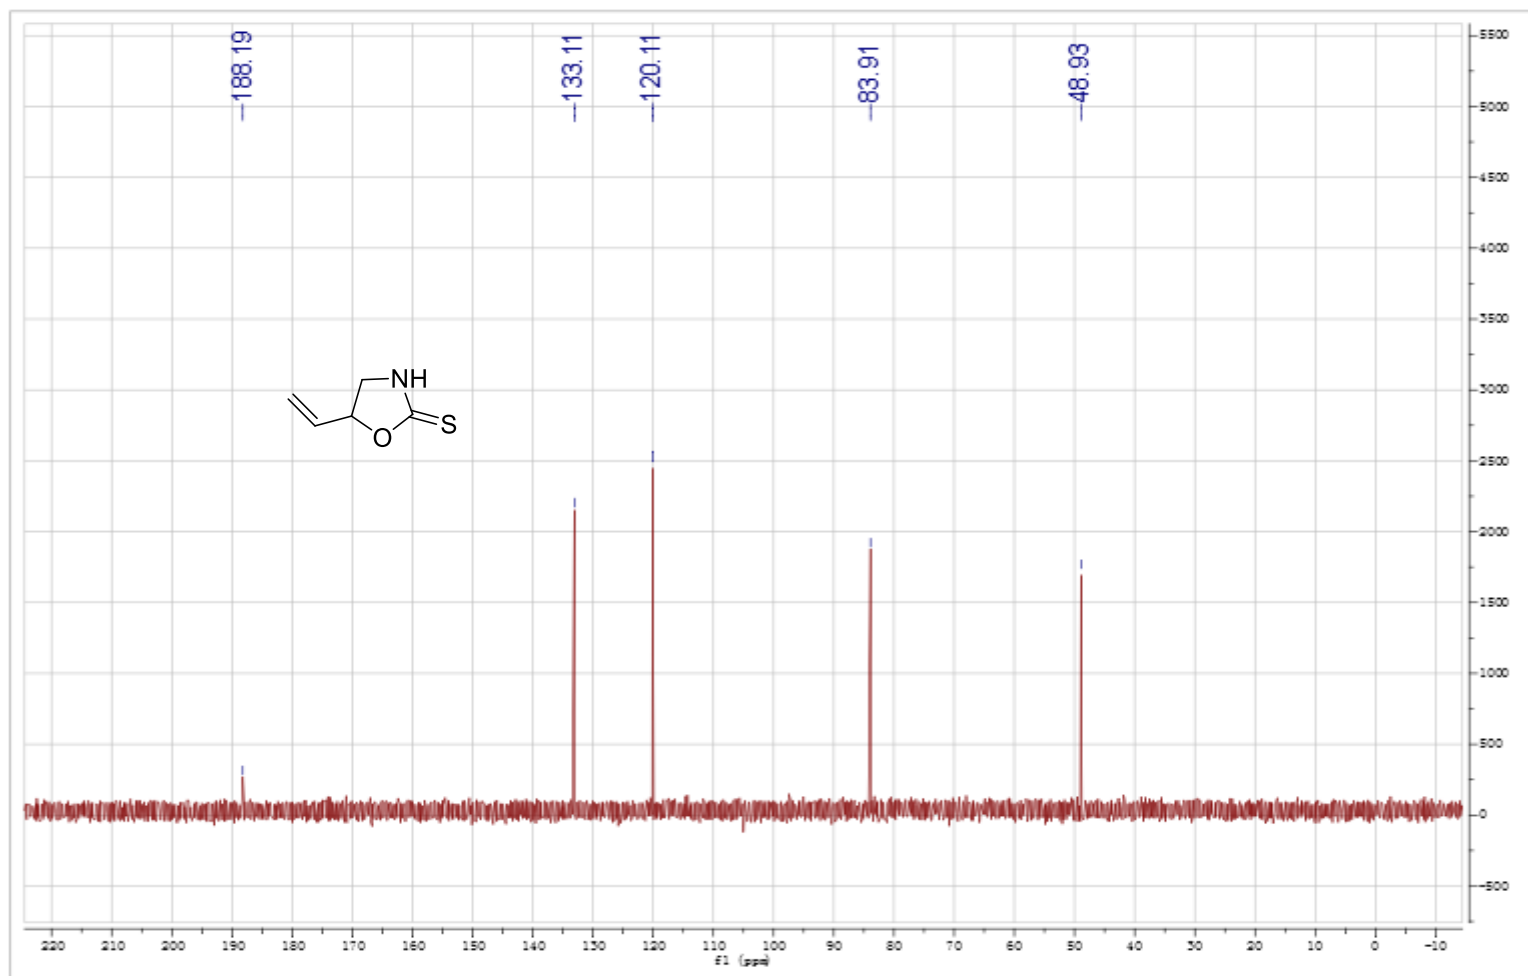

**Figure S42.** The  $^{13}\text{C}$  NMR spectrum of **1a/1b** (in  $\text{D}_2\text{O}$ )

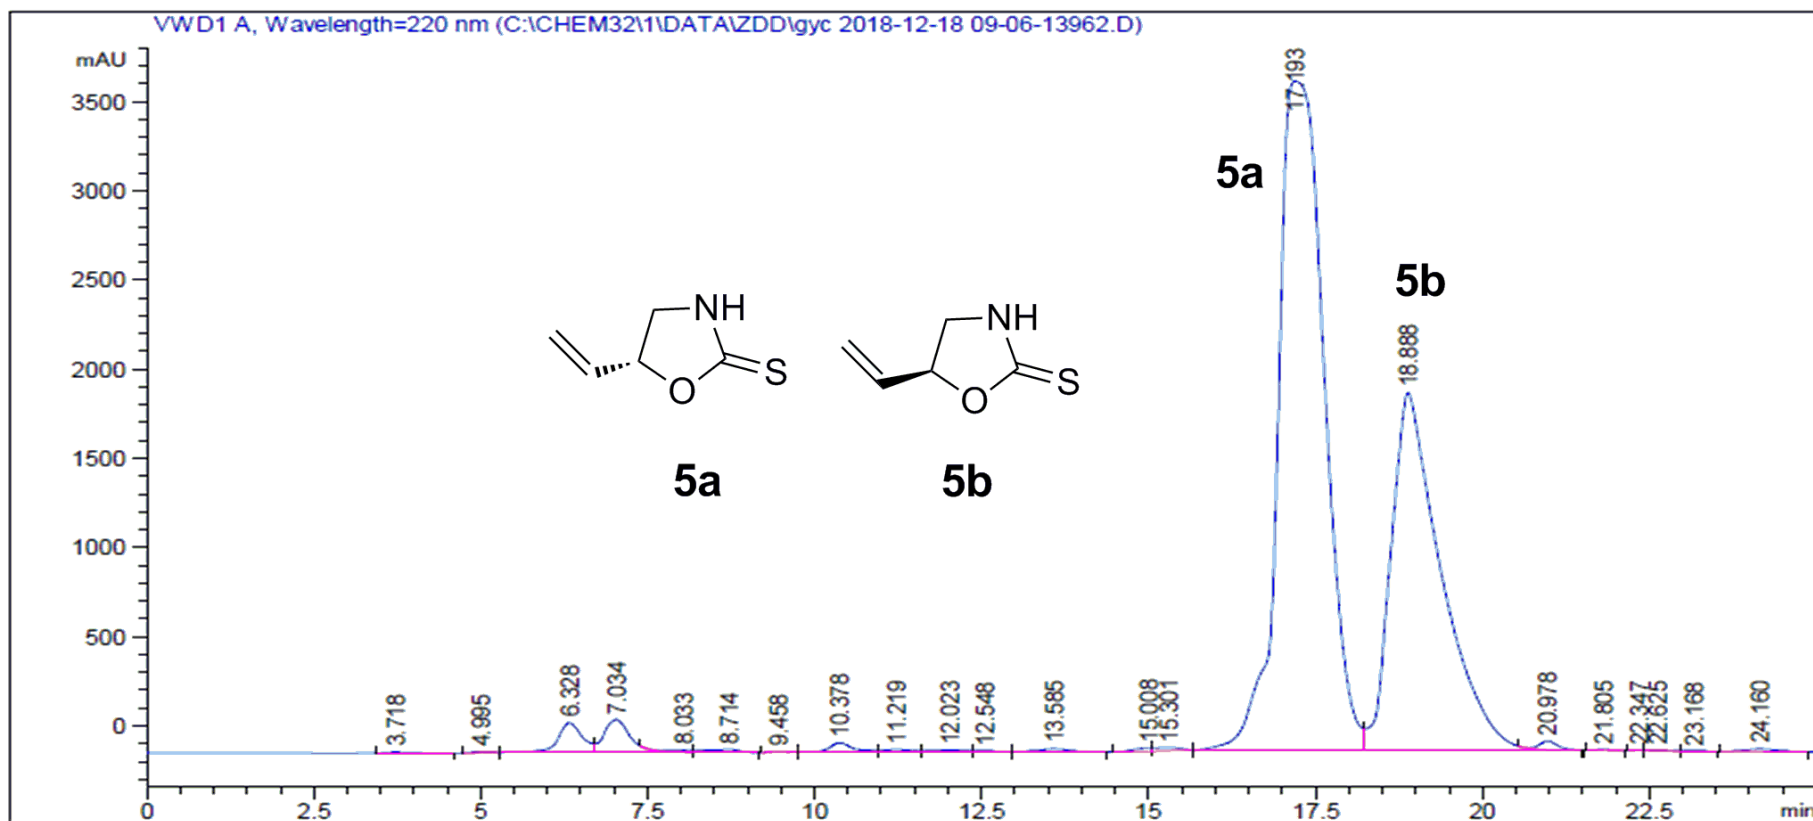

Figure S43. Chiral separation chromatography of 5
